# Supplementary material for: RELA tunes innate-like interferon I/III responses in human T cells
Source: PubMed Central journal article supplement — J Exp Med. 2023 Feb 23;220(5):e20220666. doi: 10.1084/jem.20220666 (PMC9998965; doi:10.1084/jem.20220666), 2023-02-23

SourceDataF4C

|       | Donor1 |   |      |   | Donor2 |   |      |   |
|-------|--------|---|------|---|--------|---|------|---|
|       | CD4+T  |   | MDDC |   | CD4+T  |   | MDDC |   |
| IRF3  | -      | - | +    | + | -      | - | +    | + |
| cGAMP | -      | + | -    | + | -      | + | -    | + |

|       | Donor1 |   |      |   | Donor2 |   |      |   |
|-------|--------|---|------|---|--------|---|------|---|
|       | CD4+T  |   | MDDC |   | CD4+T  |   | MDDC |   |
| IRF3  | -      | - | +    | + | -      | - | +    | + |
| cGAMP | -      | + | -    | + | -      | + | -    | + |

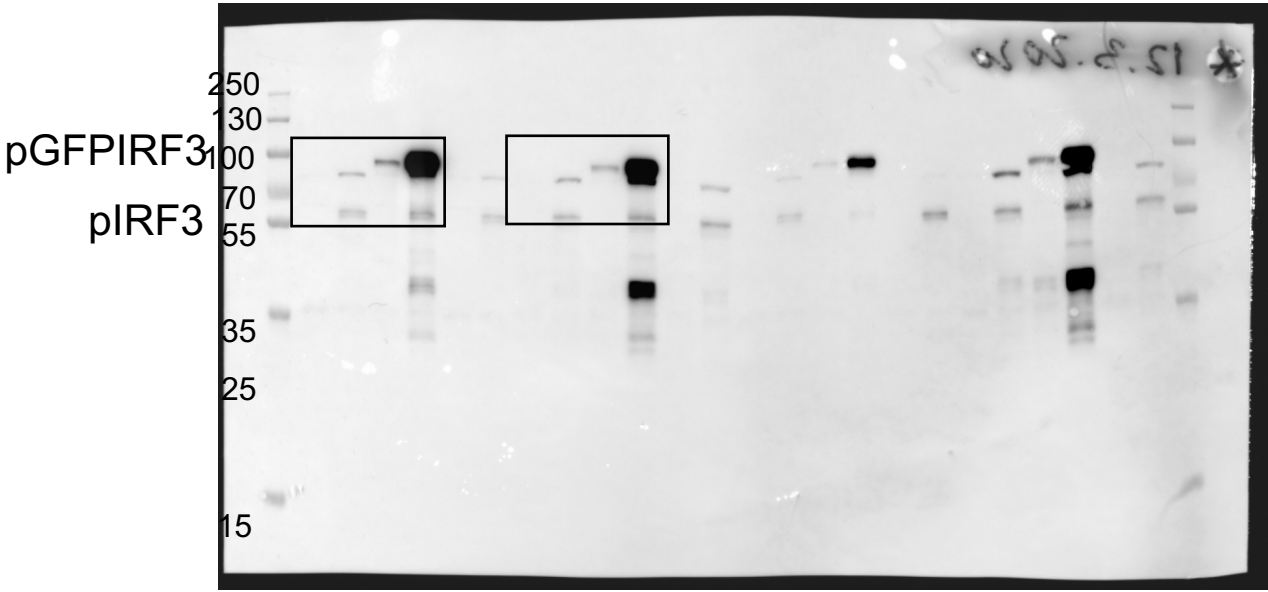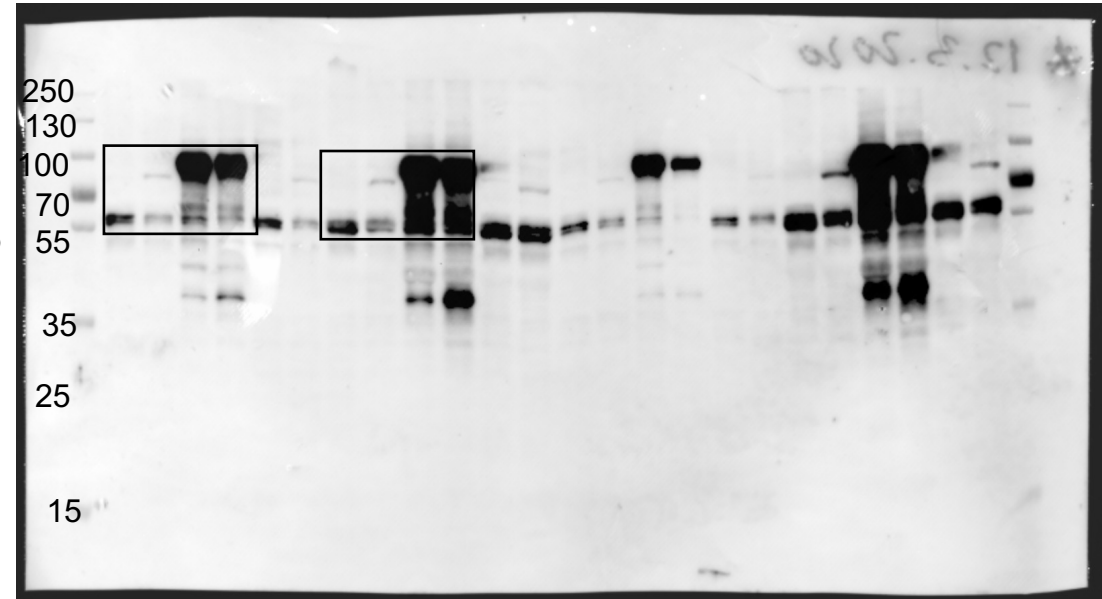

|       | Donor1 |   |      |   | Donor2 |   |      |   |
|-------|--------|---|------|---|--------|---|------|---|
|       | CD4+T  |   | MDDC |   | CD4+T  |   | MDDC |   |
| IRF3  | -      | - | +    | + | -      | - | +    | + |
| cGAMP | -      | + | -    | + | -      | + | -    | + |

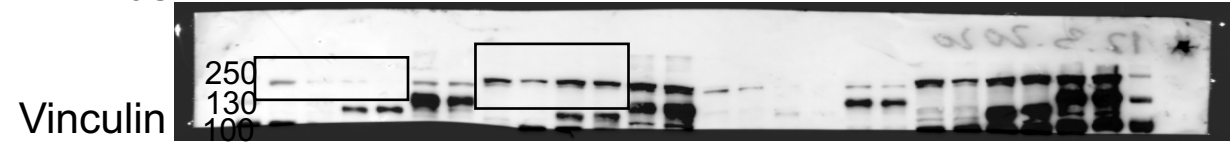

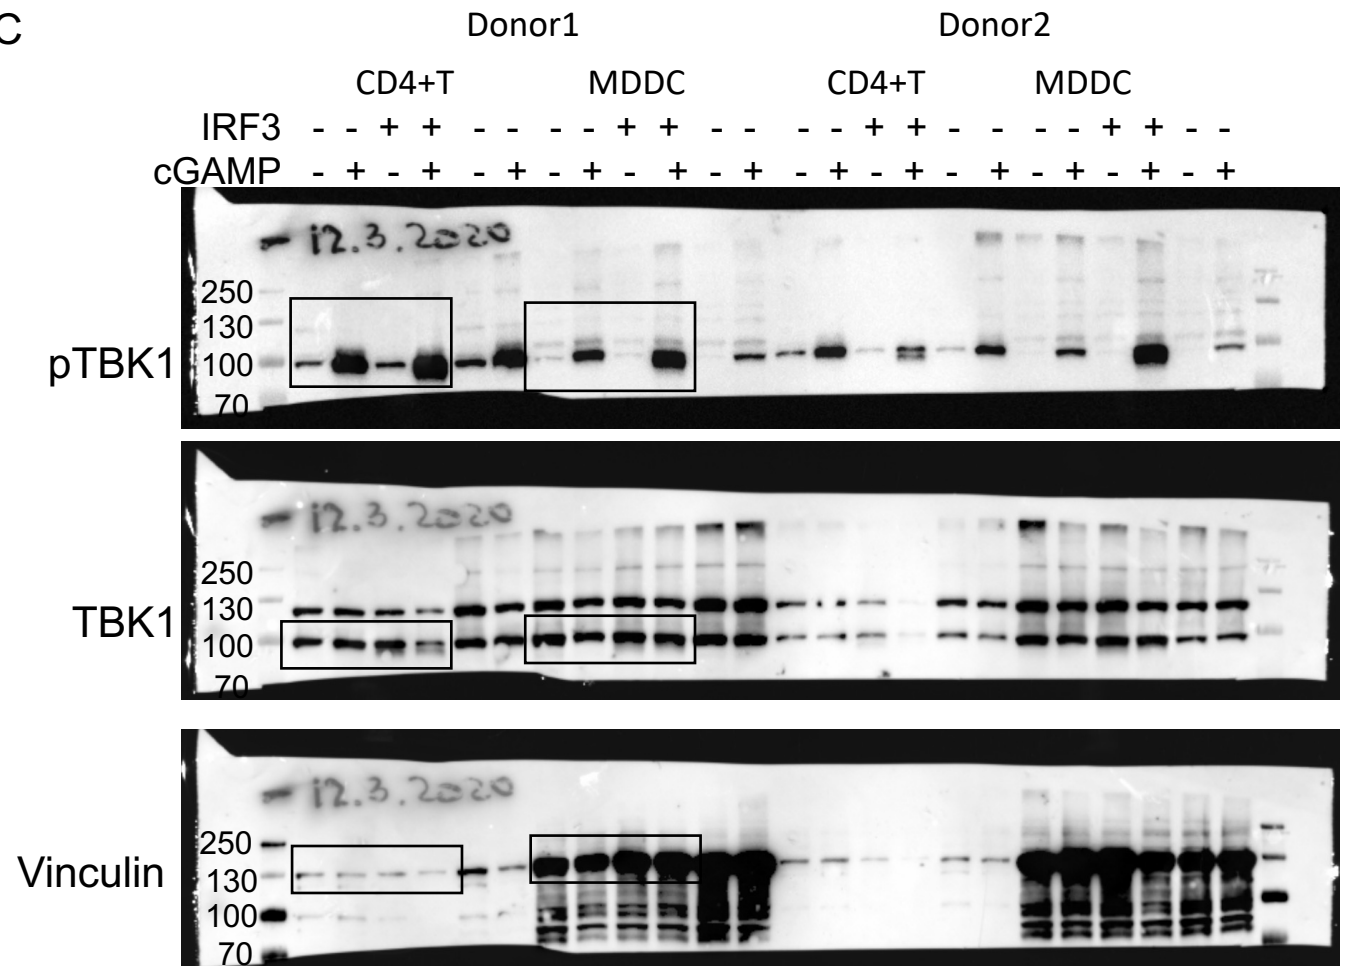

|       | Donor1 |   |   |   |      |   |   |   | Donor2 |   |   |   |      |   |   |   |   |   |   |   |
|-------|--------|---|---|---|------|---|---|---|--------|---|---|---|------|---|---|---|---|---|---|---|
|       | CD4+T  |   |   |   | MDDC |   |   |   | CD4+T  |   |   |   | MDDC |   |   |   |   |   |   |   |
| IRF3  | -      | - | + | + | -    | - | - | + | +      | - | - | + | +    | - | - | - | + | + | - | - |
| cGAMP | -      | + | - | + | -    | + | - | + | -      | + | - | + | -    | + | - | + | - | + | - | + |

pSTING

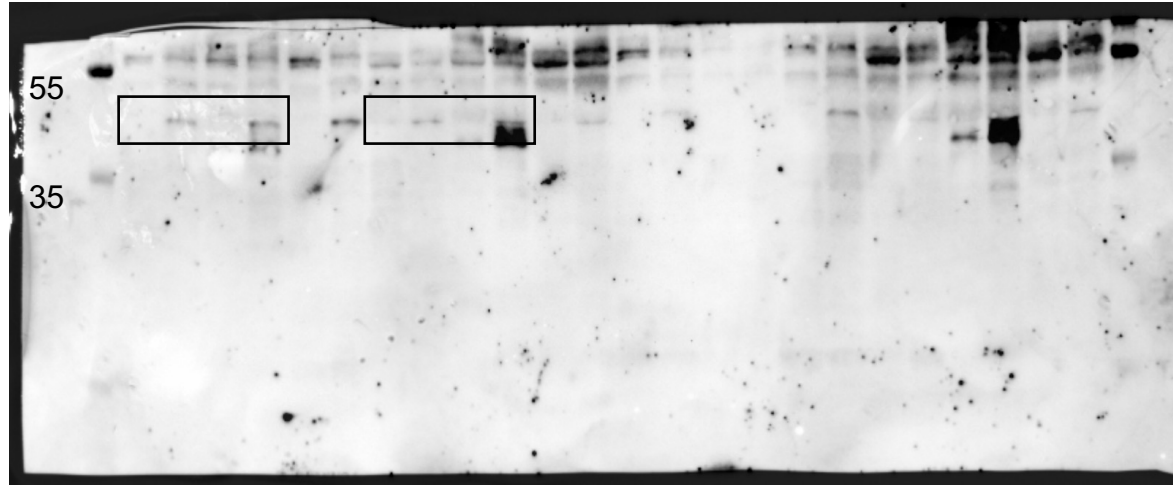

STING

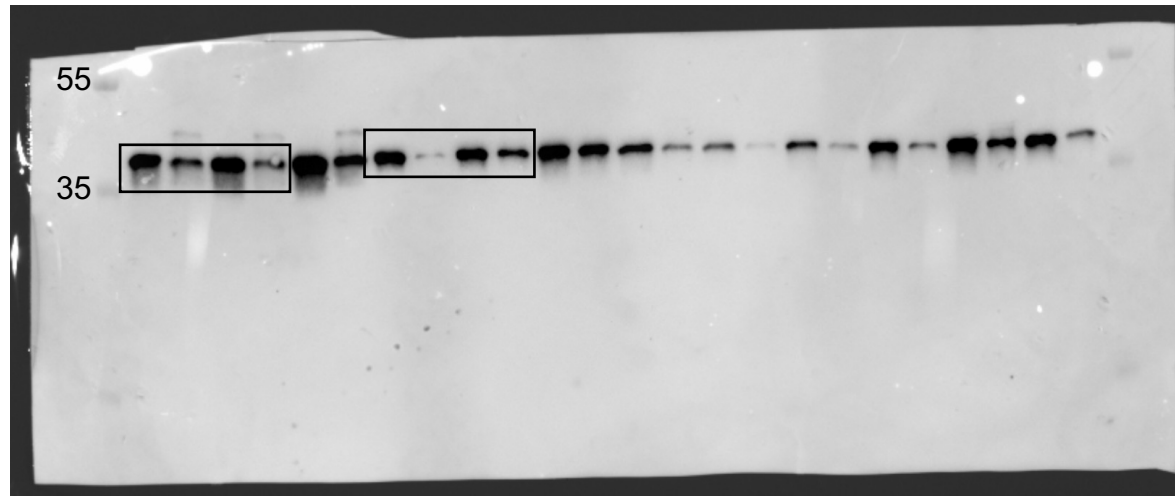

|       | Donor1 |   |   |   | Donor2 |   |   |   |
|-------|--------|---|---|---|--------|---|---|---|
| 5'AZA | -      | - | + | + | -      | - | + | + |
| cGAMP | -      | + | - | + | -      | + | - | + |

pSTING

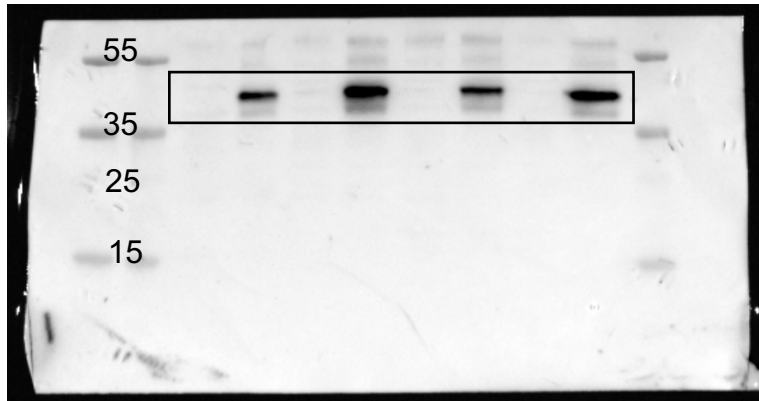

STING

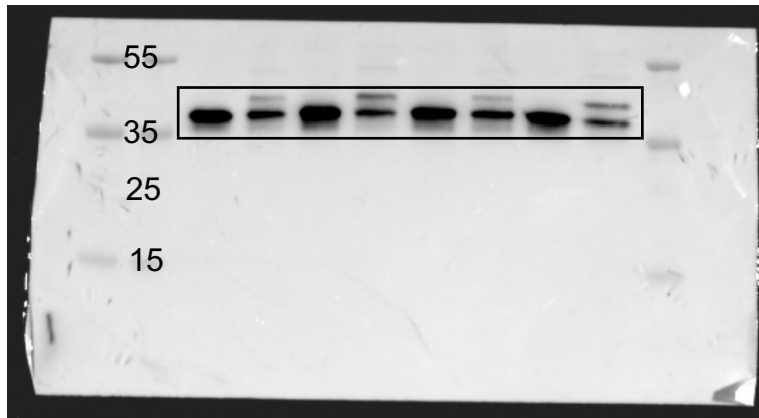

|       | Donor1 |   |   |   | Donor2 |   |   |   |
|-------|--------|---|---|---|--------|---|---|---|
| 5'AZA | -      | - | + | + | -      | - | + | + |
| cGAMP | -      | + | - | + | -      | + | - | + |

pTBK1

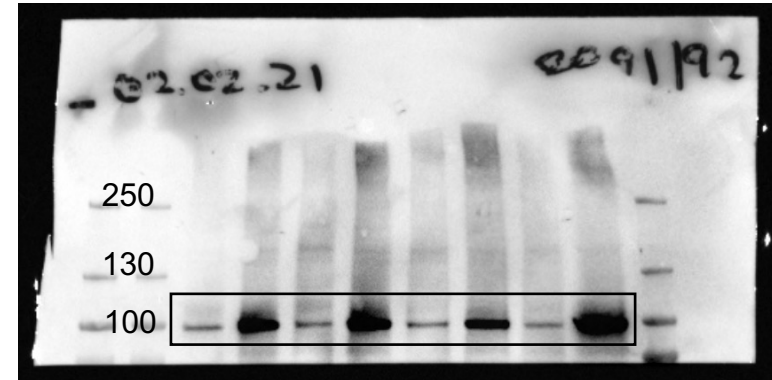

TBK1

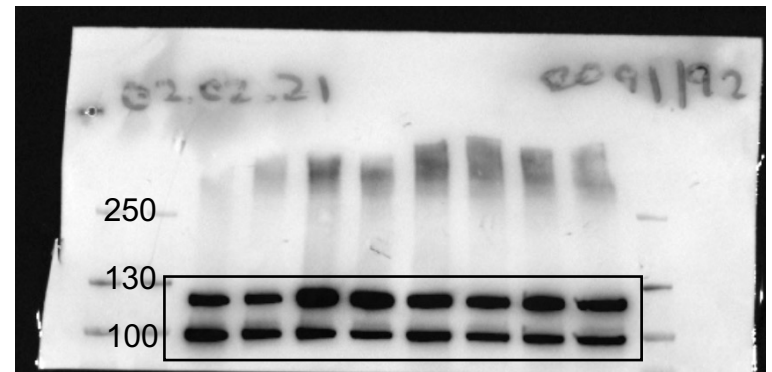

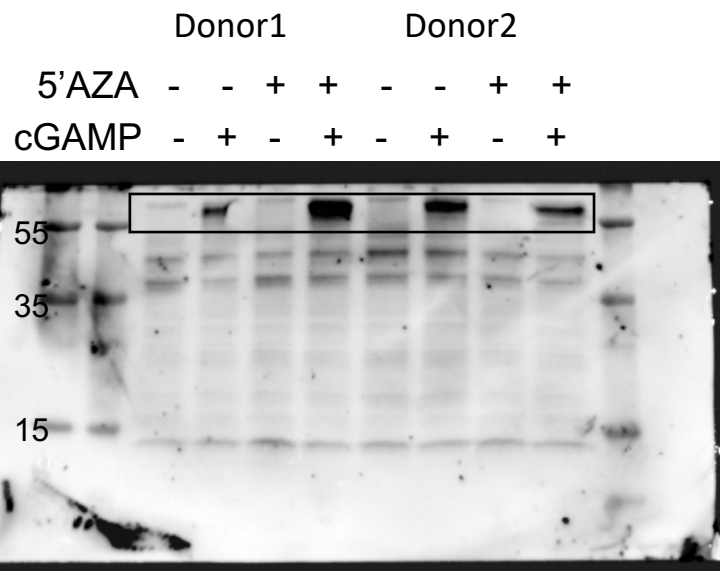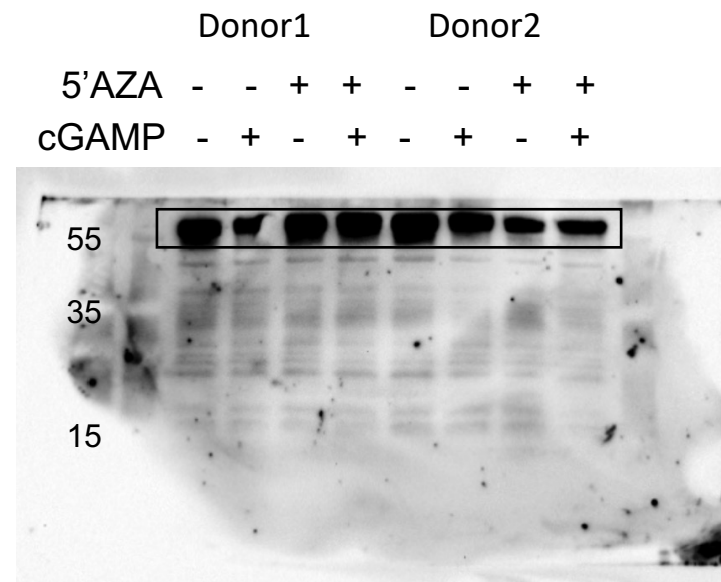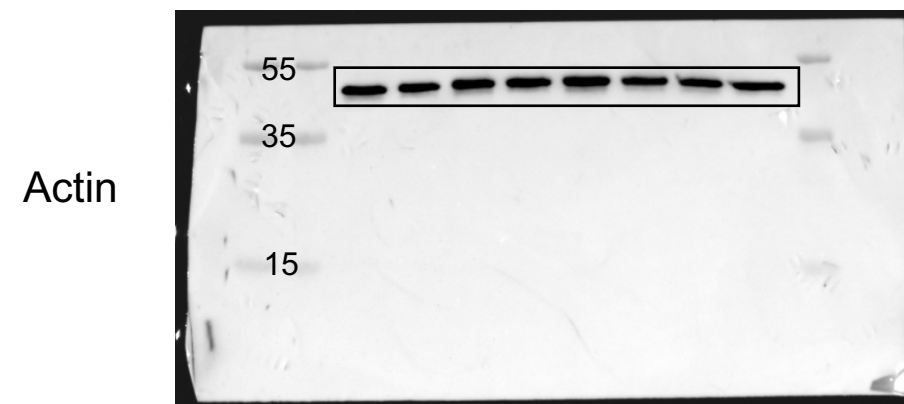

Supplement: JEM_20220666_SourceDataF4.pdf [file JEM_20220666_SourceDataF4.pdf]
