# Supplementary material for: RELA tunes innate-like interferon I/III responses in human T cells
Source: PubMed Central journal article supplement — J Exp Med. 2023 Feb 23;220(5):e20220666. doi: 10.1084/jem.20220666 (PMC9998965; doi:10.1084/jem.20220666), 2023-02-23

|              | donor1 |   |   |   |   |   | donor2 |   |   |   |   |   |
|--------------|--------|---|---|---|---|---|--------|---|---|---|---|---|
| Control gRNA | +      | + | + | - | - | - | +      | + | + | - | - | - |
| cGAS gRNA    | -      | - | - | + | + | + | -      | - | - | + | + | + |
| GFP          | +      | - | - | + | - | - | +      | - | - | + | - | - |
| RELAK5R      | -      | + | + | - | + | + | -      | + | + | - | + | + |
| IRF3         | -      | - | + | - | - | + | -      | - | + | - | - | + |
| 5AZA         | -      | - | - | + | + | + | -      | - | - | + | + | + |

|              | donor1 |   |   |   |   |   | donor2 |   |   |   |   |   |
|--------------|--------|---|---|---|---|---|--------|---|---|---|---|---|
| Control gRNA | +      | + | + | - | - | - | +      | + | + | - | - | - |
| cGAS gRNA    | -      | - | - | + | + | + | -      | - | - | + | + | + |
| GFP          | +      | - | - | + | - | - | +      | - | - | + | - | - |
| RELAK5R      | -      | + | + | - | + | + | -      | + | + | - | + | + |
| IRF3         | -      | - | + | - | - | + | -      | - | + | - | - | + |
| 5AZA         | -      | - | - | + | + | + | -      | - | - | + | + | + |

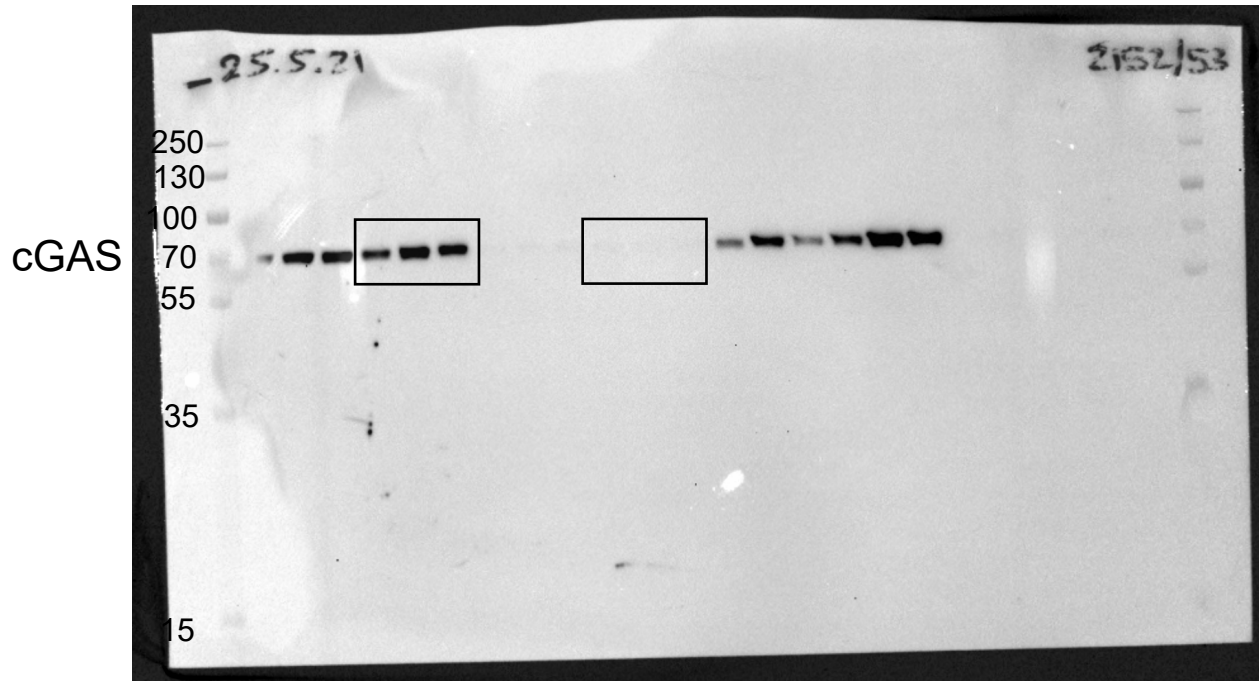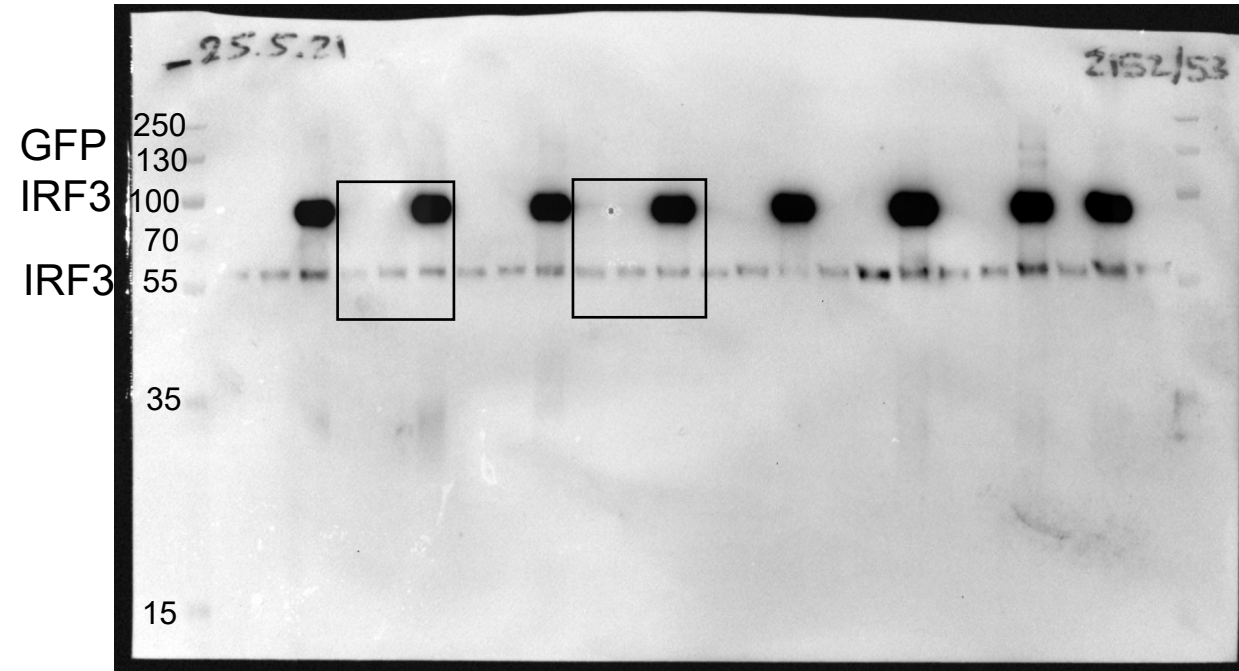

| SourceDataF6A | donor1 |   |   |   |   |   | donor2 |   |   |   |   |   |   |   |   |   |   |   |
|---------------|--------|---|---|---|---|---|--------|---|---|---|---|---|---|---|---|---|---|---|
| Control gRNA  | +++    | - | - | - | + | + | +      | - | - | - | + | + | + | - | - | - |   |   |
| cGAS gRNA     | -      | - | - | + | + | + | -      | - | - | + | + | + | - | - | - | + | + | + |
| GFP           | +      | - | - | + | - | - | +      | - | - | + | - | - | + | - | - | + | - | - |
| RELAK5R       | -      | + | + | - | + | + | -      | + | + | - | + | + | - | + | + | - | + | + |
| IRF3          | -      | - | + | - | - | + | -      | - | + | - | - | + | - | - | + | - | - | + |
| 5AZA          | -      | - | - | + | + | + | -      | - | - | + | + | + | - | - | - | + | + | + |

|              | donor1 |   |   |   |   |   | donor2 |   |   |   |   |   |   |   |   |   |   |   |   |
|--------------|--------|---|---|---|---|---|--------|---|---|---|---|---|---|---|---|---|---|---|---|
| Control gRNA | +++    | - | - | - | + | + | +      | - | - | - | + | + | + | - | - | - | + | + | + |
| cGAS gRNA    | -      | - | - | + | + | + | -      | - | - | + | + | + | - | - | - | + | + | + | + |
| GFP          | +      | - | - | + | - | - | +      | - | - | + | - | - | + | - | - | + | - | - | + |
| RELAK5R      | -      | + | + | - | + | + | -      | + | + | - | + | + | - | + | + | - | + | + | + |
| IRF3         | -      | - | + | - | - | + | -      | - | + | - | - | + | - | - | + | - | - | + | + |
| 5AZA         | -      | - | - | + | + | + | -      | - | - | + | + | + | - | - | - | + | + | + | + |

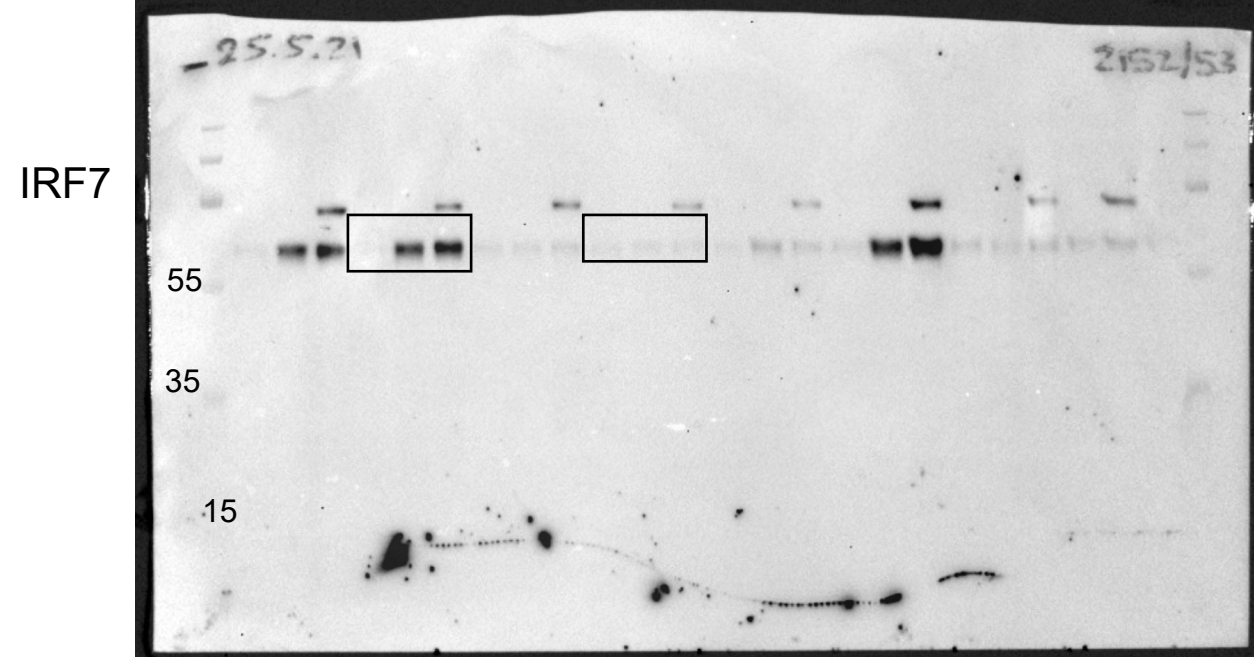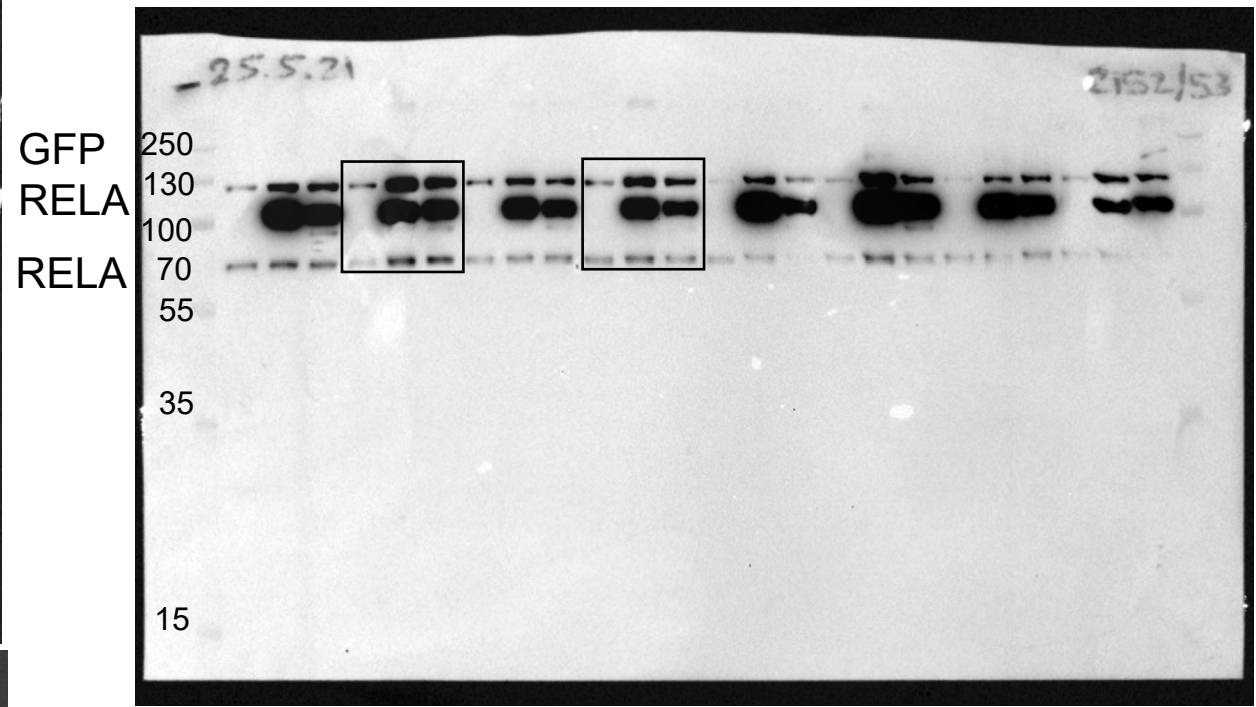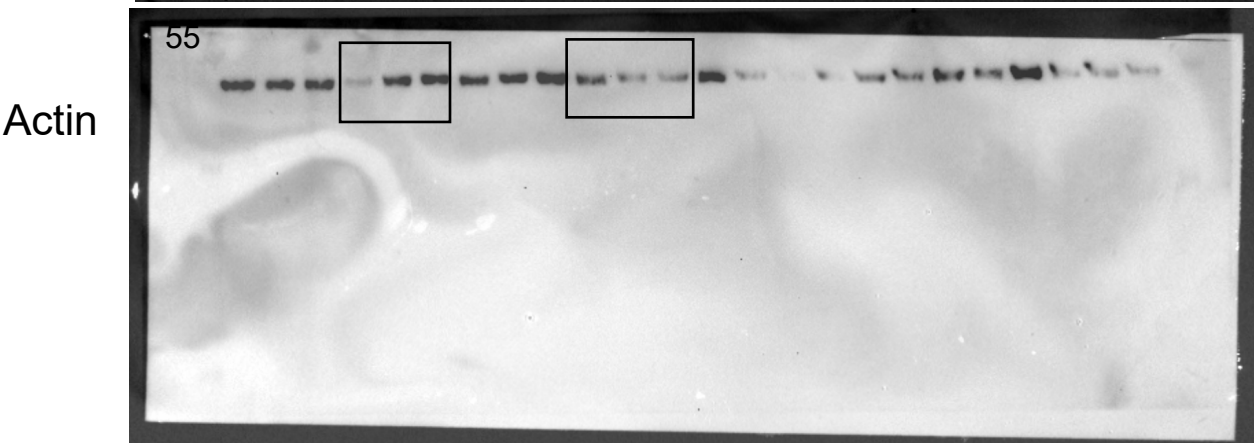

Supplement: JEM_20220666_SourceDataF6.pdf [file JEM_20220666_SourceDataF6.pdf]
