# Supplementary material for: RELA tunes innate-like interferon I/III responses in human T cells
Source: PubMed Central journal article supplement — J Exp Med. 2023 Feb 23;220(5):e20220666. doi: 10.1084/jem.20220666 (PMC9998965; doi:10.1084/jem.20220666), 2023-02-23

# SourceDataF8D

|          | donor1 |   |   |   |   |   | donor2 |   |   |   |   |   |
|----------|--------|---|---|---|---|---|--------|---|---|---|---|---|
| RELA K5R | -      | - | + | + | + | + | -      | - | + | + | + | + |
| IRF3     | -      | - | - | - | + | + | -      | - | + | + | + | + |
| 5AZA     | -      | - | + | + | + | + | -      | - | + | + | + | + |
| B18R     | -      | + | - | + | - | + | -      | + | - | + | - | + |
| Control  | +      | - | + | - | + | - | +      | - | + | - | + | - |

|          | donor1 |   |   |   |   |   | donor2 |   |   |   |   |   |
|----------|--------|---|---|---|---|---|--------|---|---|---|---|---|
| RELA K5R | -      | - | + | + | + | + | -      | - | + | + | + | + |
| IRF3     | -      | - | - | - | + | + | -      | - | + | + | + | + |
| 5AZA     | -      | - | + | + | + | + | -      | - | + | + | + | + |
| B18R     | -      | + | - | + | - | + | -      | + | - | + | - | + |
| Control  | +      | - | + | - | + | - | +      | - | + | - | + | - |

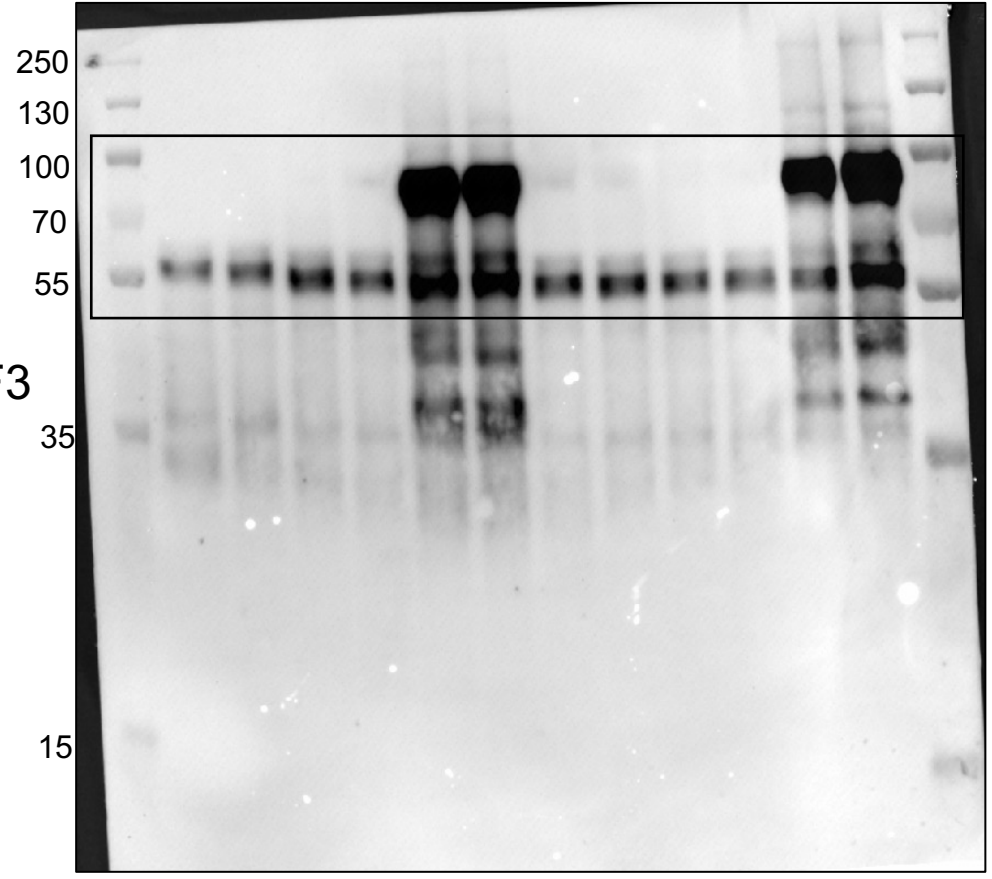

IRF7

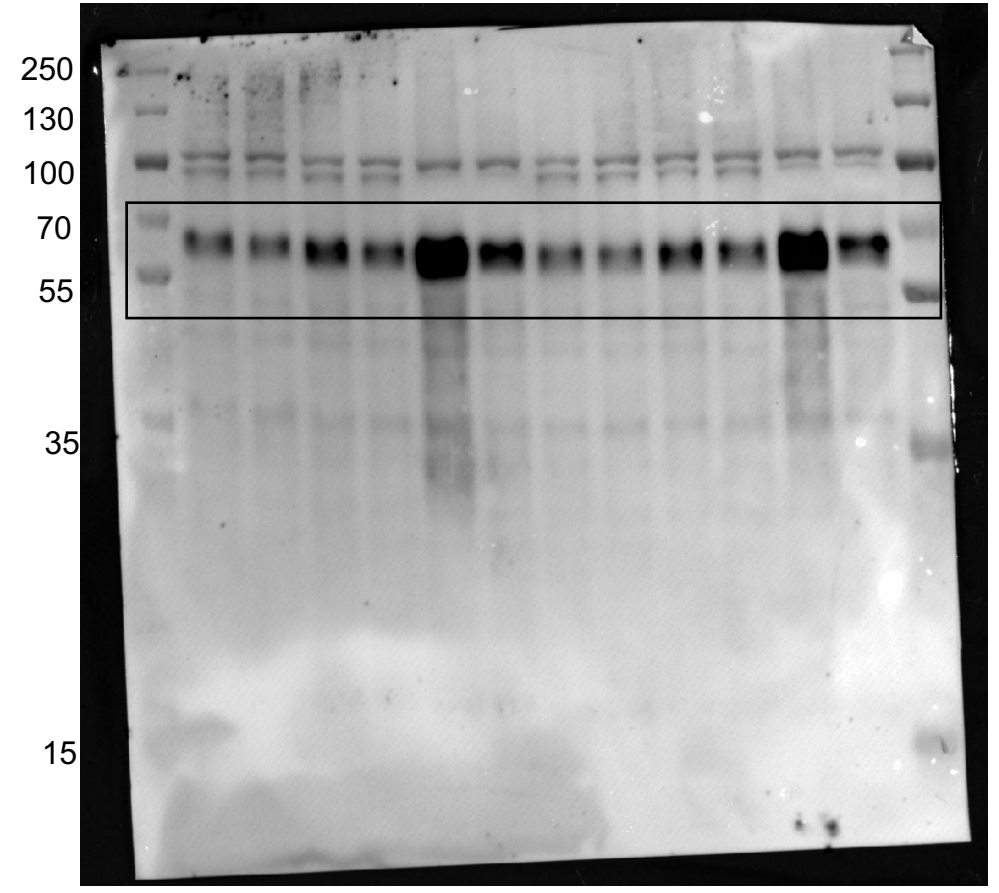

# SourceDataF8D

|          | donor1 |   |   |   |   |   | donor2 |   |   |   |   |   |
|----------|--------|---|---|---|---|---|--------|---|---|---|---|---|
| RELA K5R | -      | - | + | + | + | + | -      | - | + | + | + | + |
| IRF3     | -      | - | - | - | + | + | -      | - | + | + | + | + |
| 5AZA     | -      | - | + | + | + | + | -      | - | + | + | + | + |
| B18R     | -      | + | - | + | - | + | -      | + | - | + | - | + |
| Control  | +      | - | + | - | + | - | +      | - | + | - | + | - |

|          | donor1 |   |   |   |   |   | donor2 |   |   |   |   |   |
|----------|--------|---|---|---|---|---|--------|---|---|---|---|---|
| RELA K5R | -      | - | + | + | + | + | -      | - | + | + | + | + |
| IRF3     | -      | - | - | - | + | + | -      | - | + | + | + | + |
| 5AZA     | -      | - | + | + | + | + | -      | - | + | + | + | + |
| B18R     | -      | + | - | + | - | + | -      | + | - | + | - | + |
| Control  | +      | - | + | - | + | - | +      | - | + | - | + | - |

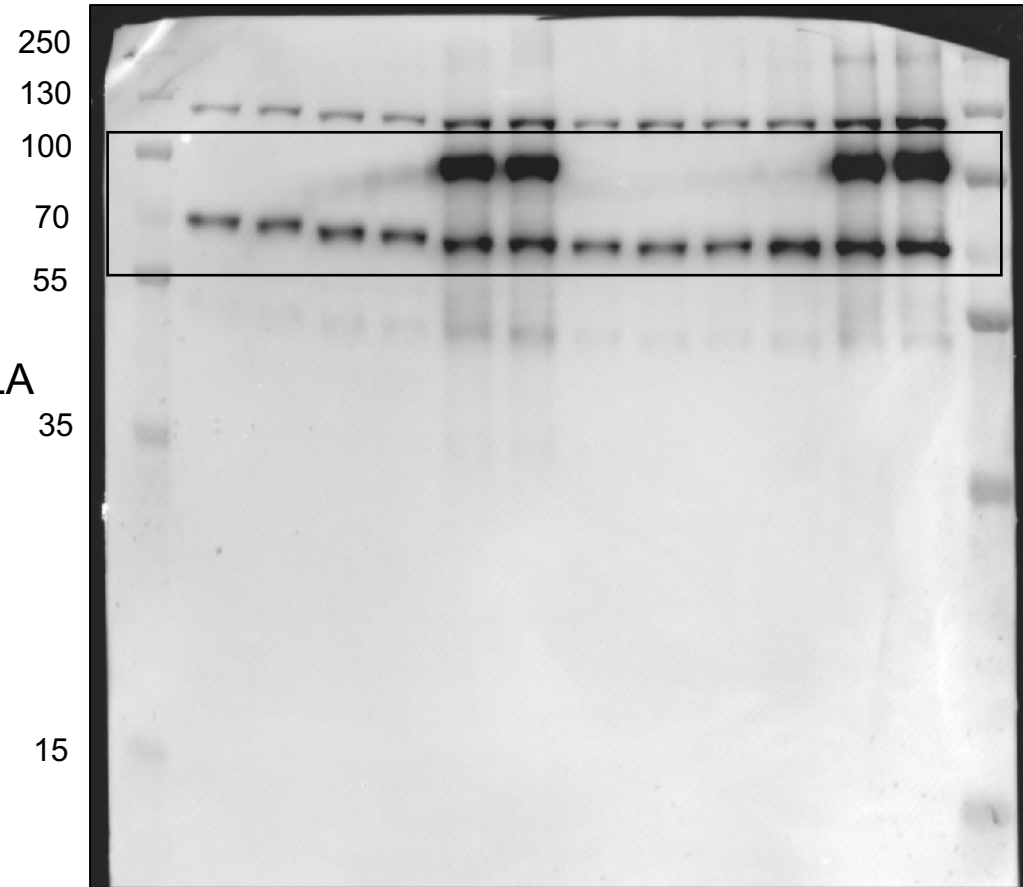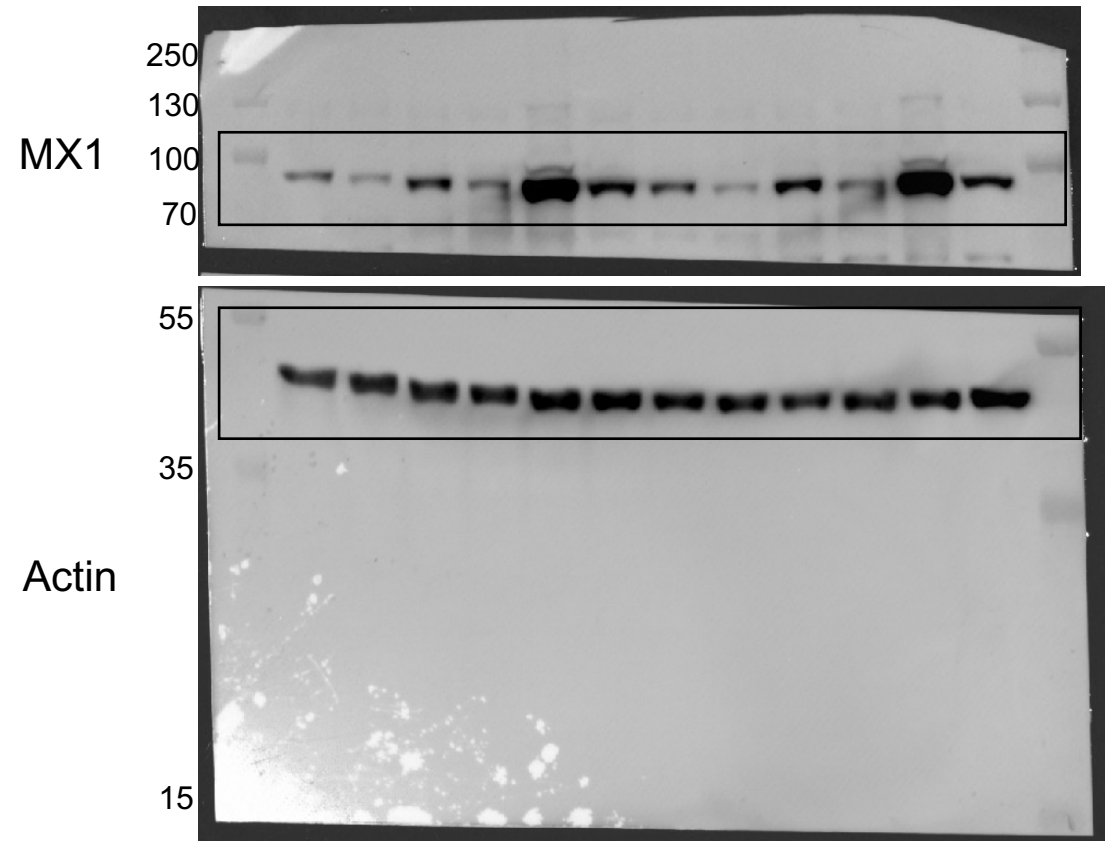

Supplement: JEM_20220666_SourceDataF8.pdf [file JEM_20220666_SourceDataF8.pdf]
