# Supplementary material for: RELA tunes innate-like interferon I/III responses in human T cells
Source: PubMed Central journal article supplement — J Exp Med. 2023 Feb 23;220(5):e20220666. doi: 10.1084/jem.20220666 (PMC9998965; doi:10.1084/jem.20220666), 2023-02-23

|       | donor1 |   | donor2 |   | donor3 |   |
|-------|--------|---|--------|---|--------|---|
| TSA   | -      | + | -      | + | -      | + |
| SeV   | -      | - | +      | - | -      | + |
| cGAMP | -      | + | -      | + | -      | + |

pSTING

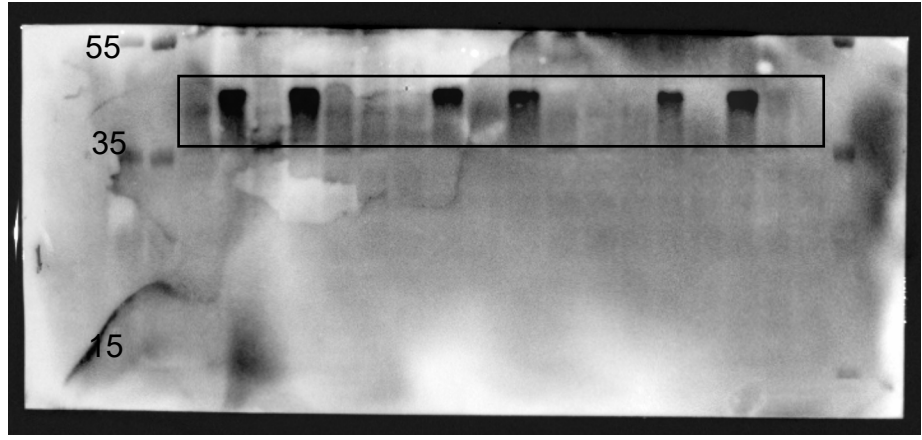

|       | donor1 |   | donor2 |   | donor3 |   |
|-------|--------|---|--------|---|--------|---|
| TSA   | -      | + | -      | + | -      | + |
| SeV   | -      | - | +      | - | -      | + |
| cGAMP | -      | + | -      | + | -      | + |

Actin

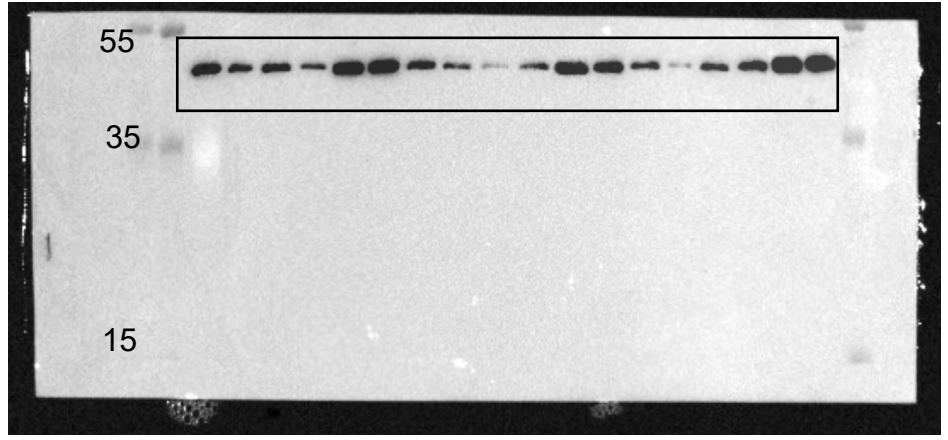

STING

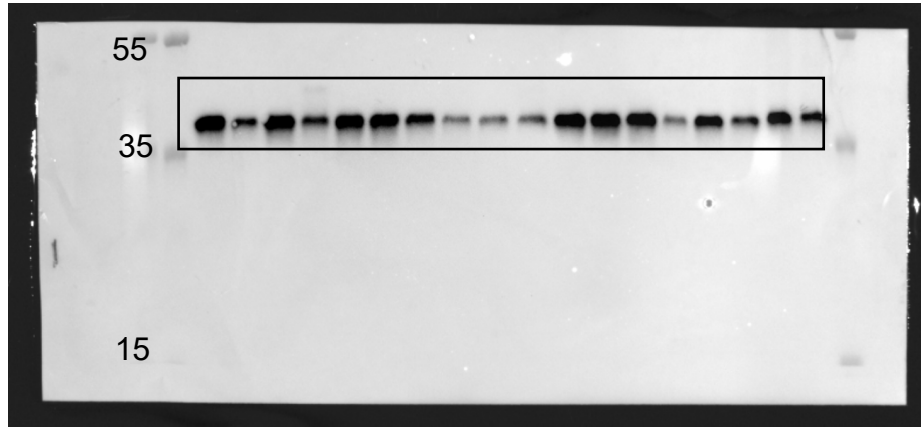

SourceDataSF3C

|       | donor1 |   |   |   | donor2 |   |   |   | donor3 |   |   |   |   |   |   |   |
|-------|--------|---|---|---|--------|---|---|---|--------|---|---|---|---|---|---|---|
| TSA   | -      | - | + | + | -      | - | - | + | +      | - | - | - | + | + | - | - |
| SeV   | -      | - | - | - | +      | - | - | - | -      | + | - | - | - | - | - | + |
| cGAMP | -      | + | - | + | -      | - | + | - | +      | - | - | - | + | - | + | - |

pTBK1

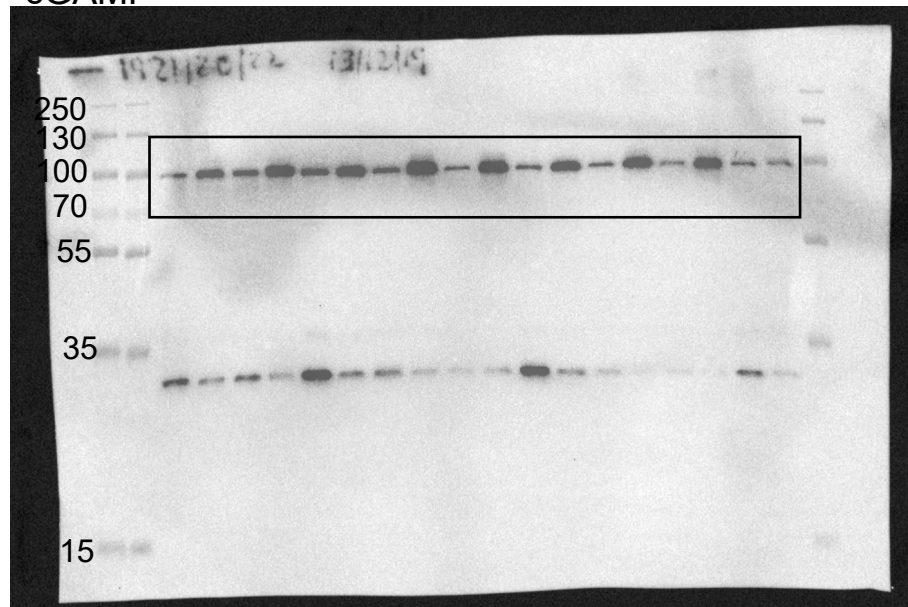

|       | donor1 |   |   |   | donor2 |   |   |   | donor3 |   |   |   |   |   |   |   |
|-------|--------|---|---|---|--------|---|---|---|--------|---|---|---|---|---|---|---|
| TSA   | -      | - | + | + | -      | - | - | + | +      | - | - | - | + | + | - | - |
| SeV   | -      | - | - | - | +      | - | - | - | -      | + | - | - | - | - | - | + |
| cGAMP | -      | + | - | + | -      | - | + | - | +      | - | - | - | + | - | + | - |

Actin

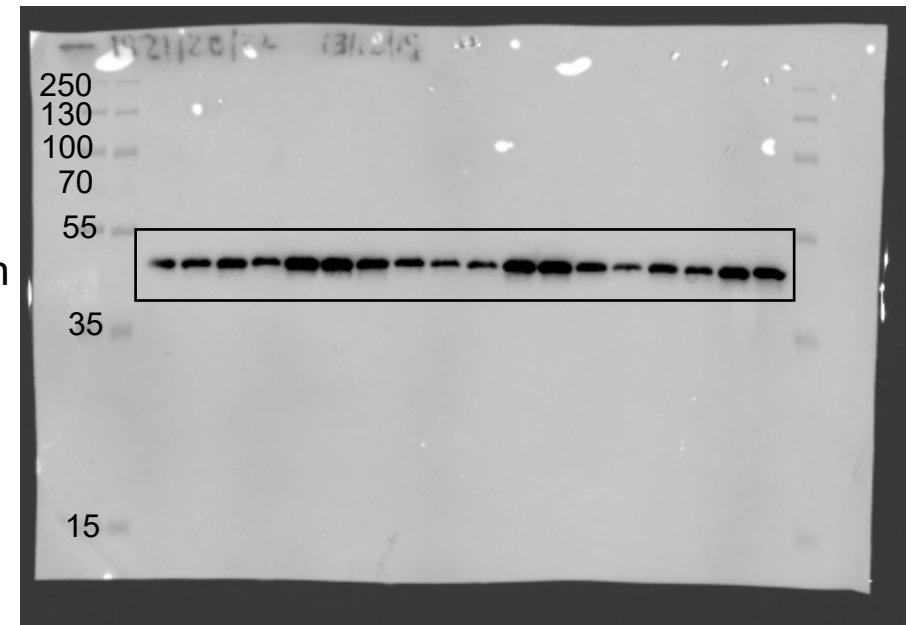

TBK1

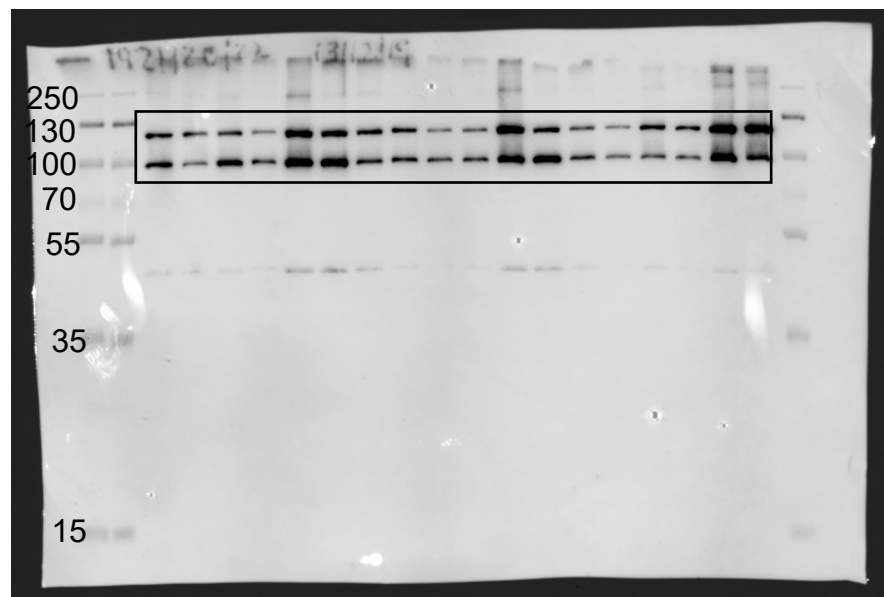

SourceDataSF3C

|       | donor1 |   |   |   | donor2 |   |   |   | donor3 |   |   |   |   |   |   |   |   |
|-------|--------|---|---|---|--------|---|---|---|--------|---|---|---|---|---|---|---|---|
| TSA   | -      | - | + | + | -      | - | - | - | +      | + | - | - | + | + | - | - |   |
| SeV   | -      | - | - | - | -      | - | + | - | -      | - | - | - | + | - | - | - | + |
| cGAMP | -      | + | - | + | -      | - | - | + | -      | + | - | - | - | + | - | + | - |

pIRF3

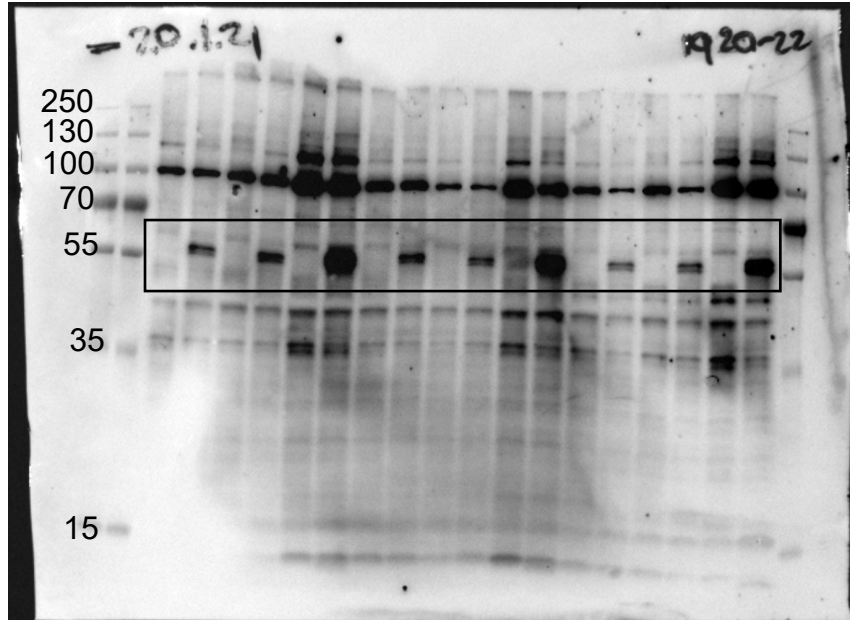

IRF3

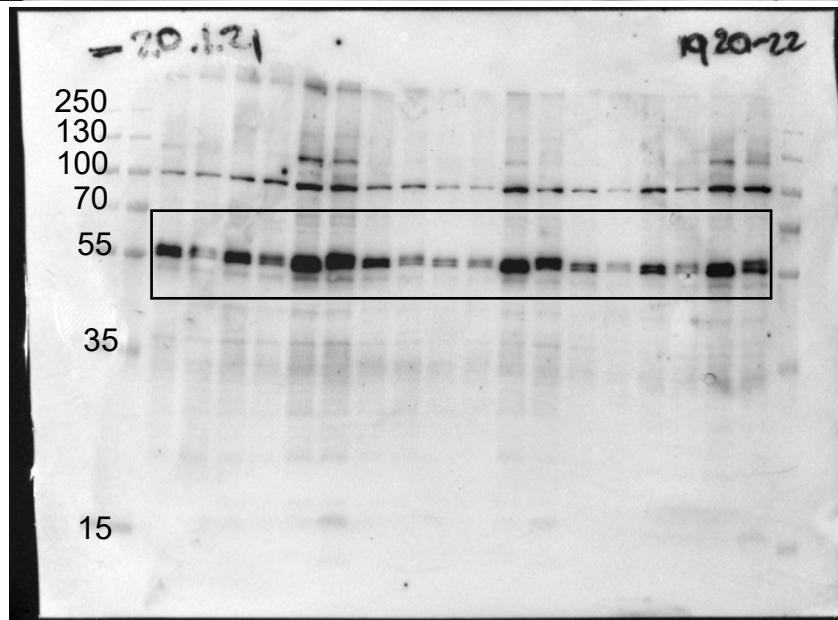

|  | donor1 |  |  |  | donor2 |  |  |  | donor3 |  |  |  |
|--|--------|--|--|--|--------|--|--|--|--------|--|--|--|
|--|--------|--|--|--|--------|--|--|--|--------|--|--|--|

|       |   |   |   |   |   |   |   |   |   |   |   |   |   |   |   |   |   |   |
|-------|---|---|---|---|---|---|---|---|---|---|---|---|---|---|---|---|---|---|
| TSA   | - | - | + | + | - | - | - | - | + | + | - | - | - | - | + | + | - | - |
| SeV   | - | - | - | - | - | - | + | - | - | - | - | - | + | - | - | - | - | + |
| cGAMP | - | + | - | + | - | - | - | + | - | + | - | - | - | - | + | - | + | - |

Actin

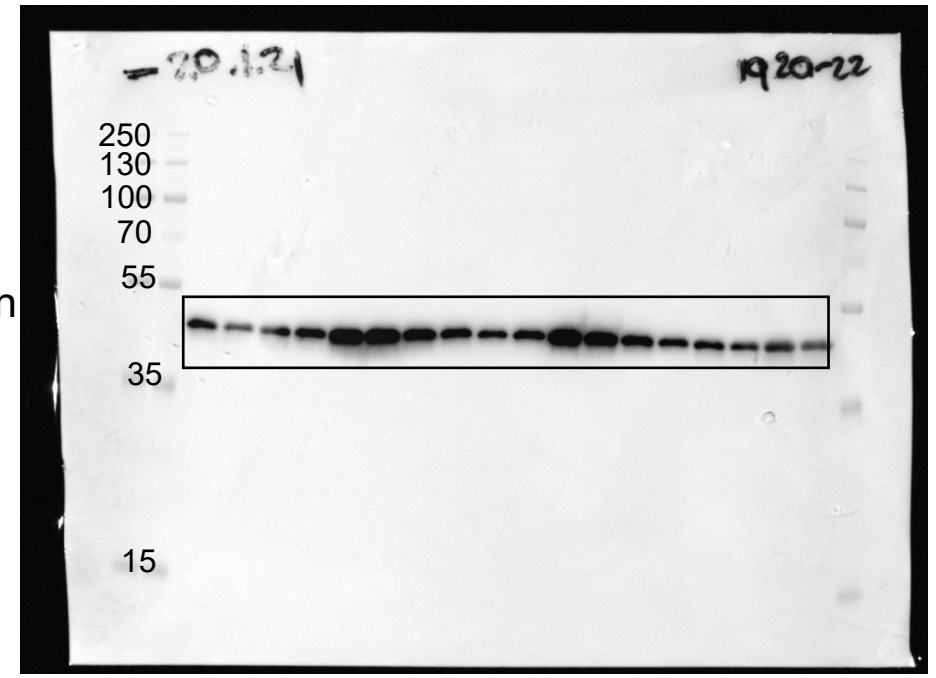

SourceDataSF3E

|        |     | Donor1 |   |   |   | Donor2 |   |   |   |   |   |
|--------|-----|--------|---|---|---|--------|---|---|---|---|---|
| GFP    | +++ | -      | + | + | + | +      | - | + | + | + | - |
| IRF3   | -   | +      | - | + | - | +      | - | + | - | - | + |
| RELA5R | -   | -      | + | + | - | -      | + | + | - | - | + |
| 5AZA   | -   | -      | - | + | + | +      | - | - | - | + | + |

|        |     | Donor1 |   |   |   | Donor2 |   |   |   |   |   |
|--------|-----|--------|---|---|---|--------|---|---|---|---|---|
| GFP    | +++ | -      | + | + | + | +      | - | + | + | + | - |
| IRF3   | -   | +      | - | + | - | +      | - | + | - | - | + |
| RELA5R | -   | -      | + | + | - | -      | + | + | - | - | + |
| 5AZA   | -   | -      | - | + | + | +      | - | - | - | + | + |

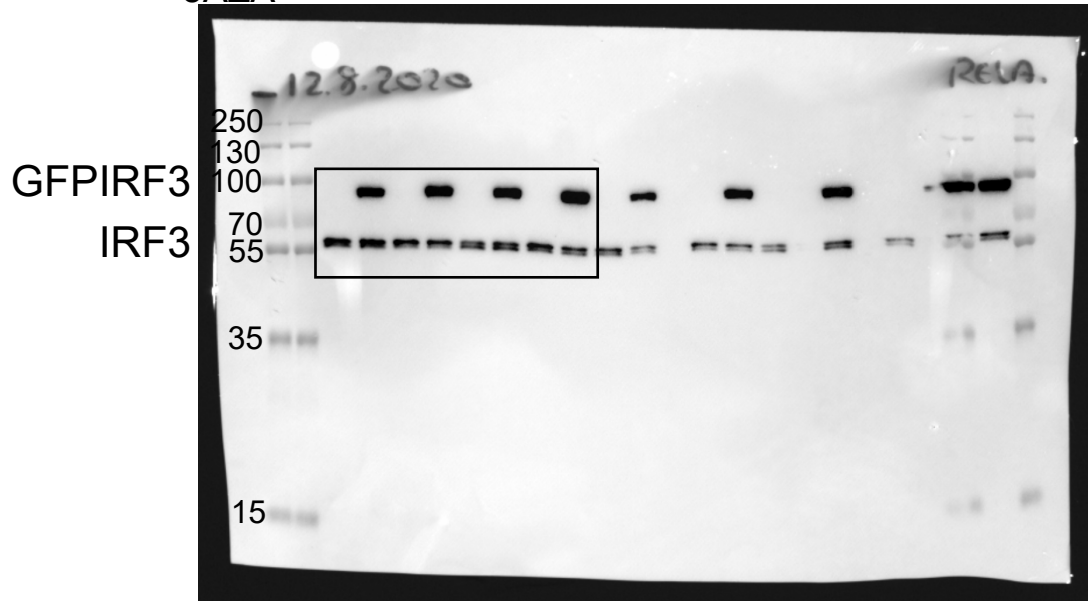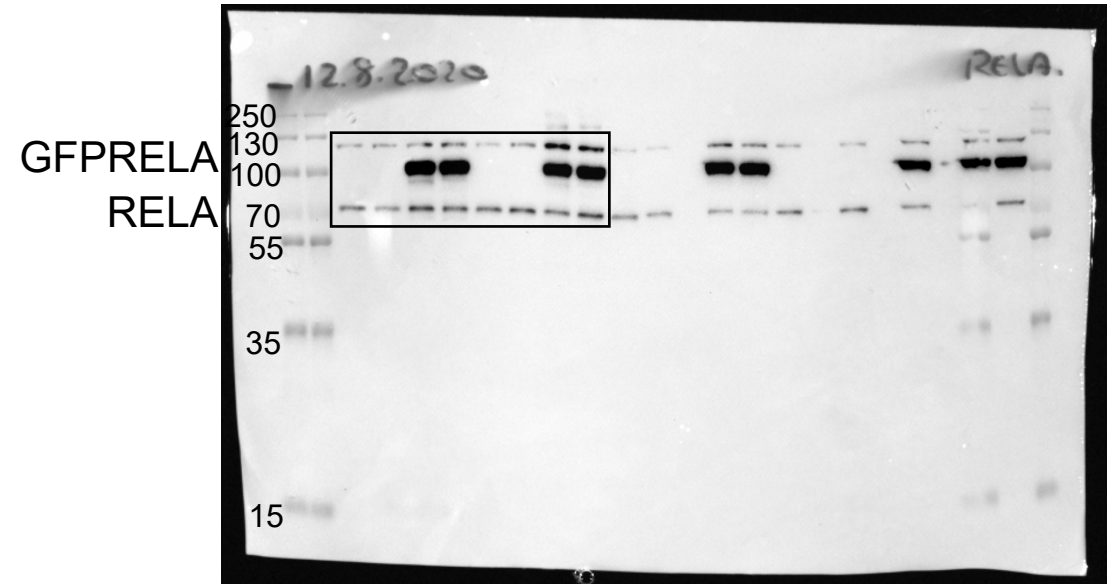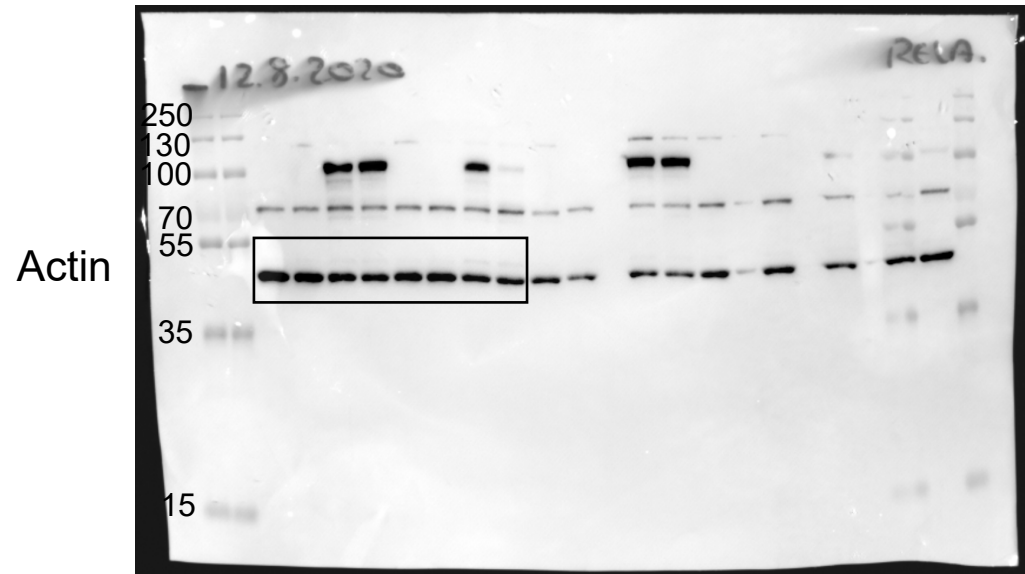

|         | Donor1 |   |      |   | Donor2 |   |      |   |   |   |   |   |   |   |   |
|---------|--------|---|------|---|--------|---|------|---|---|---|---|---|---|---|---|
|         | CD4T   |   | MDDC |   | CD4T   |   | MDDC |   |   |   |   |   |   |   |   |
|         | +      | + | -    | - | +      | + | -    | - |   |   |   |   |   |   |   |
| GFP     | +      | + | -    | - | +      | + | -    | - |   |   |   |   |   |   |   |
| RELAK5R | -      | - | +    | + | -      | - | +    | + |   |   |   |   |   |   |   |
| IRF3    | -      | - | -    | + | +      | + | +    | - | - | + | + | + | + |   |   |
| 5AZA    | -      | + | -    | + | -      | + | -    | + | - | + | - | + | - | + | - |

|         | Donor1 |   |      |   | Donor2 |   |      |   |   |   |   |   |   |   |   |
|---------|--------|---|------|---|--------|---|------|---|---|---|---|---|---|---|---|
|         | CD4T   |   | MDDC |   | CD4T   |   | MDDC |   |   |   |   |   |   |   |   |
|         | +      | + | -    | - | +      | + | -    | - |   |   |   |   |   |   |   |
| GFP     | +      | + | -    | - | +      | + | -    | - |   |   |   |   |   |   |   |
| RELAK5R | -      | - | +    | + | -      | - | +    | + |   |   |   |   |   |   |   |
| IRF3    | -      | - | -    | + | +      | + | +    | - | - | + | + | + | + |   |   |
| 5AZA    | -      | + | -    | + | -      | + | -    | + | - | + | - | + | - | + | - |

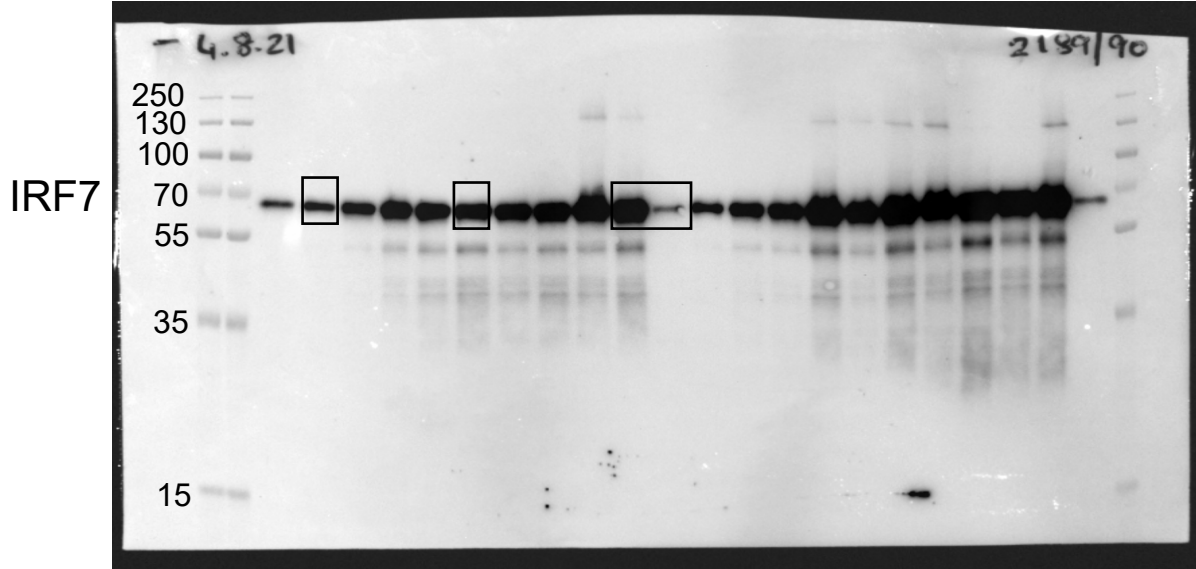

GFPRELA  
RELA

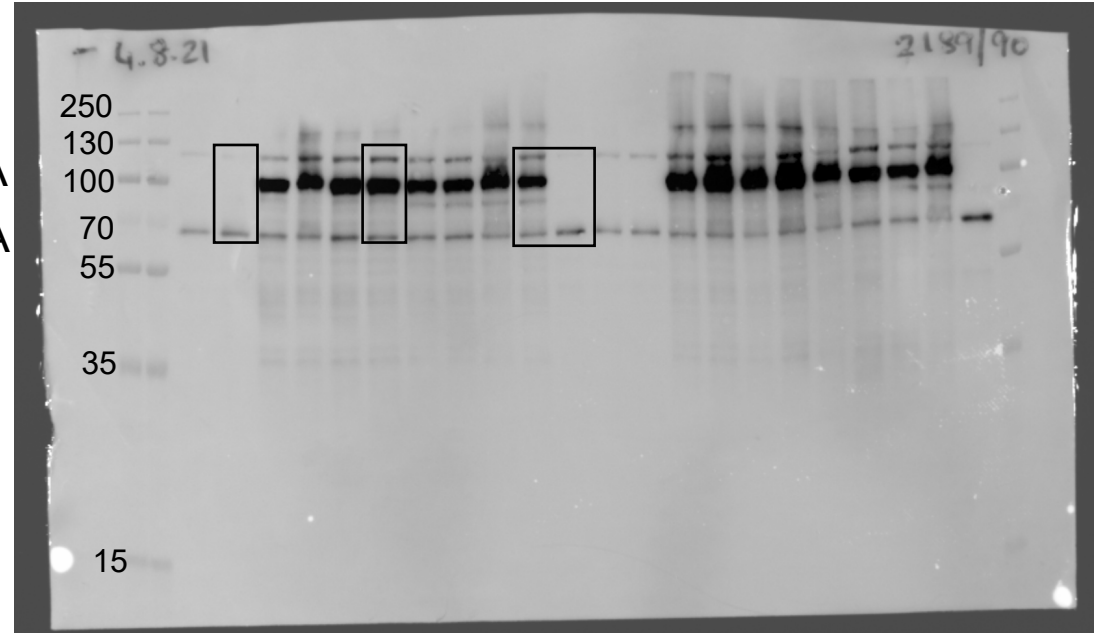

SourceDataSF3F

|         | Donor1 |   |      |   | Donor2 |   |      |   |   |   |   |   |   |   |   |   |
|---------|--------|---|------|---|--------|---|------|---|---|---|---|---|---|---|---|---|
|         | CD4T   |   | MDDC |   | CD4T   |   | MDDC |   |   |   |   |   |   |   |   |   |
| GFP     | +      | + | -    | - | -      | - | +    | + | - | - | - | - | - | - |   |   |
| RELAK5R | -      | - | +    | + | -      | + | -    | - | - | + | + | - | + | + | - |   |
| IRF3    | -      | - | -    | - | +      | + | +    | - | - | - | - | - | + | + | + | - |
| 5AZA    | -      | + | -    | + | -      | + | -    | + | - | - | + | - | + | - | + | - |

|         | Donor1 |   |      |   | Donor2 |   |      |   |   |   |   |   |   |   |   |   |
|---------|--------|---|------|---|--------|---|------|---|---|---|---|---|---|---|---|---|
|         | CD4T   |   | MDDC |   | CD4T   |   | MDDC |   |   |   |   |   |   |   |   |   |
| GFP     | +      | + | -    | - | -      | - | +    | + | - | - | - | - | - | - | - |   |
| RELAK5R | -      | - | +    | + | -      | + | -    | - | - | + | + | - | + | + | - |   |
| IRF3    | -      | - | -    | - | +      | + | +    | - | - | - | - | - | + | + | + | - |
| 5AZA    | -      | + | -    | + | -      | + | -    | + | - | - | + | - | + | - | + | - |

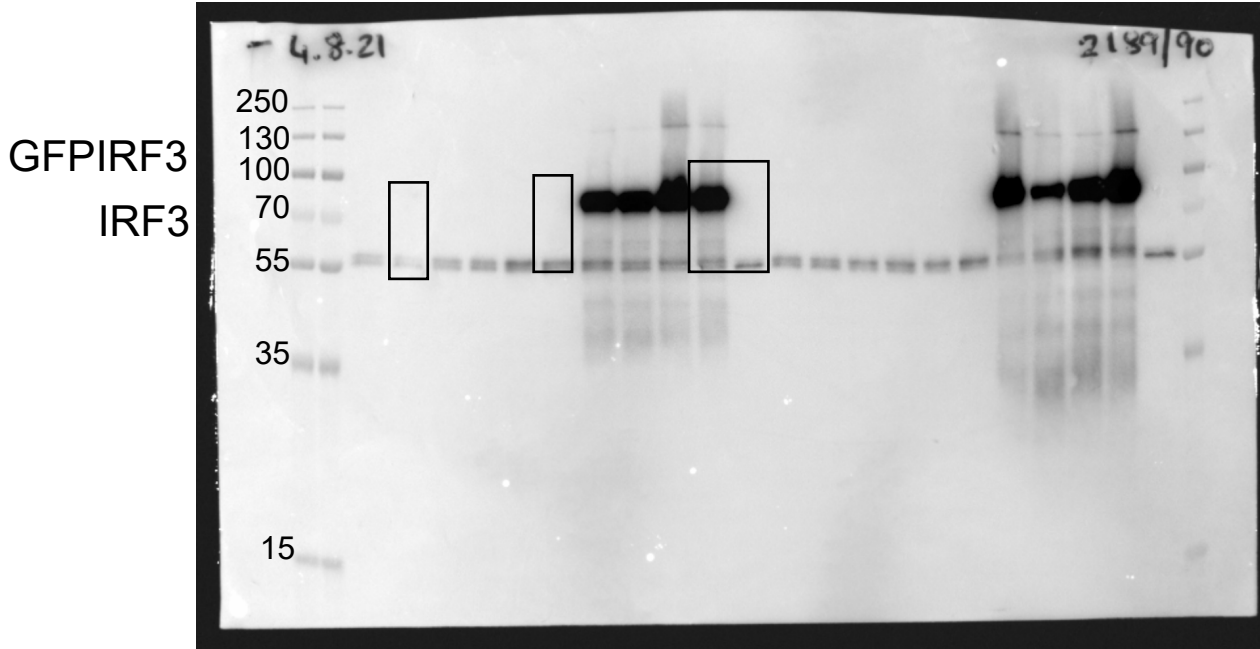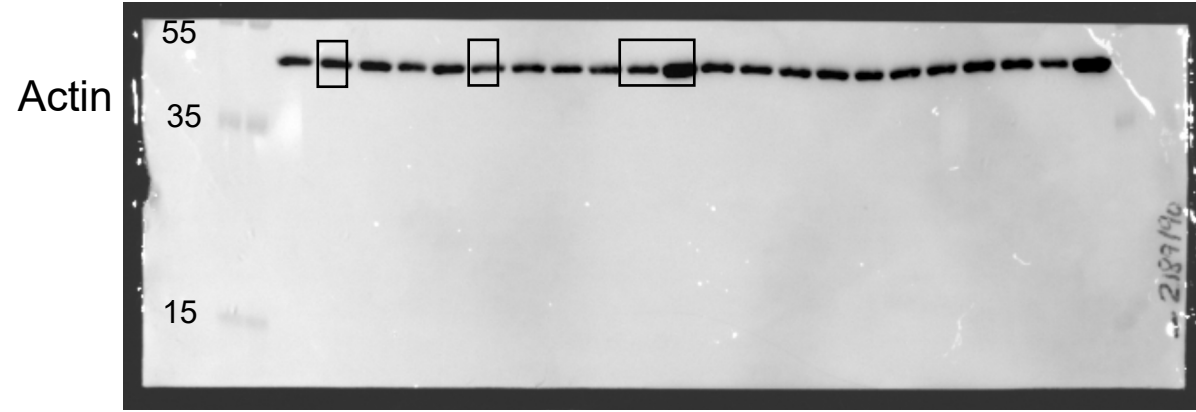

SourceDataSF3H

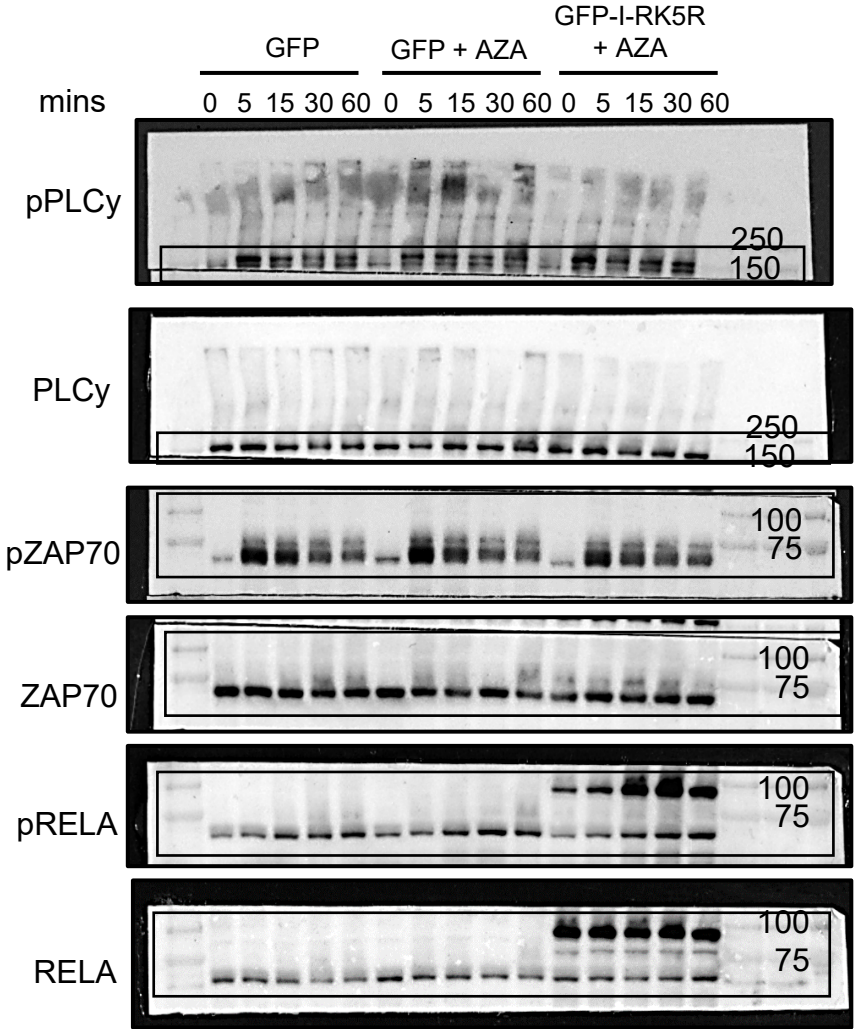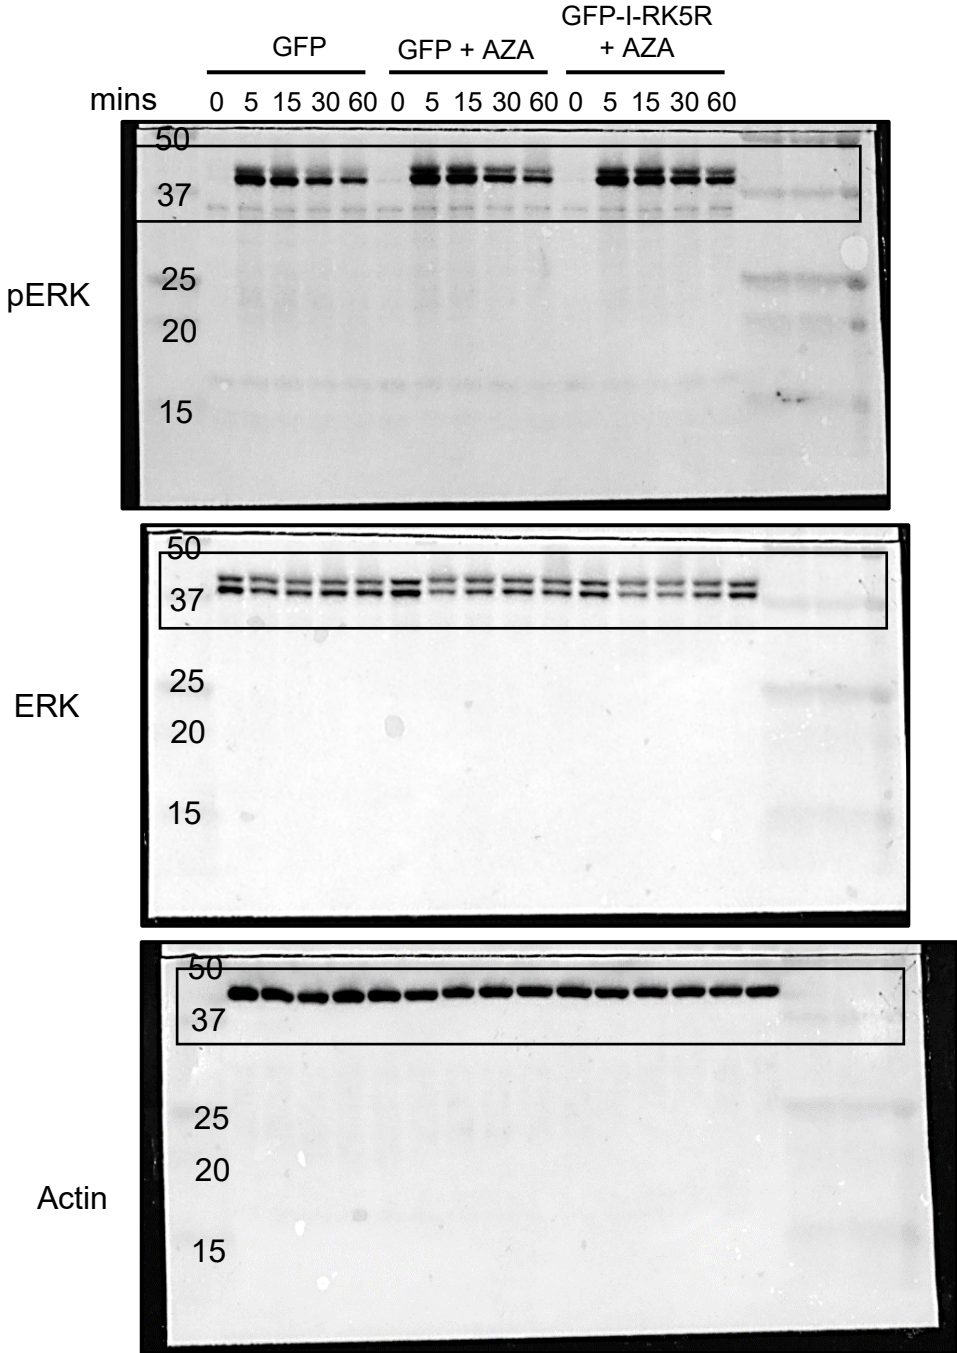

Supplement: JEM_20220666_SourceDataFS3.pdf [file JEM_20220666_SourceDataFS3.pdf]
