# Supplementary material for: RELA tunes innate-like interferon I/III responses in human T cells
Source: PubMed Central journal article supplement — J Exp Med. 2023 Feb 23;220(5):e20220666. doi: 10.1084/jem.20220666 (PMC9998965; doi:10.1084/jem.20220666), 2023-02-23

# SourceDataSF4A

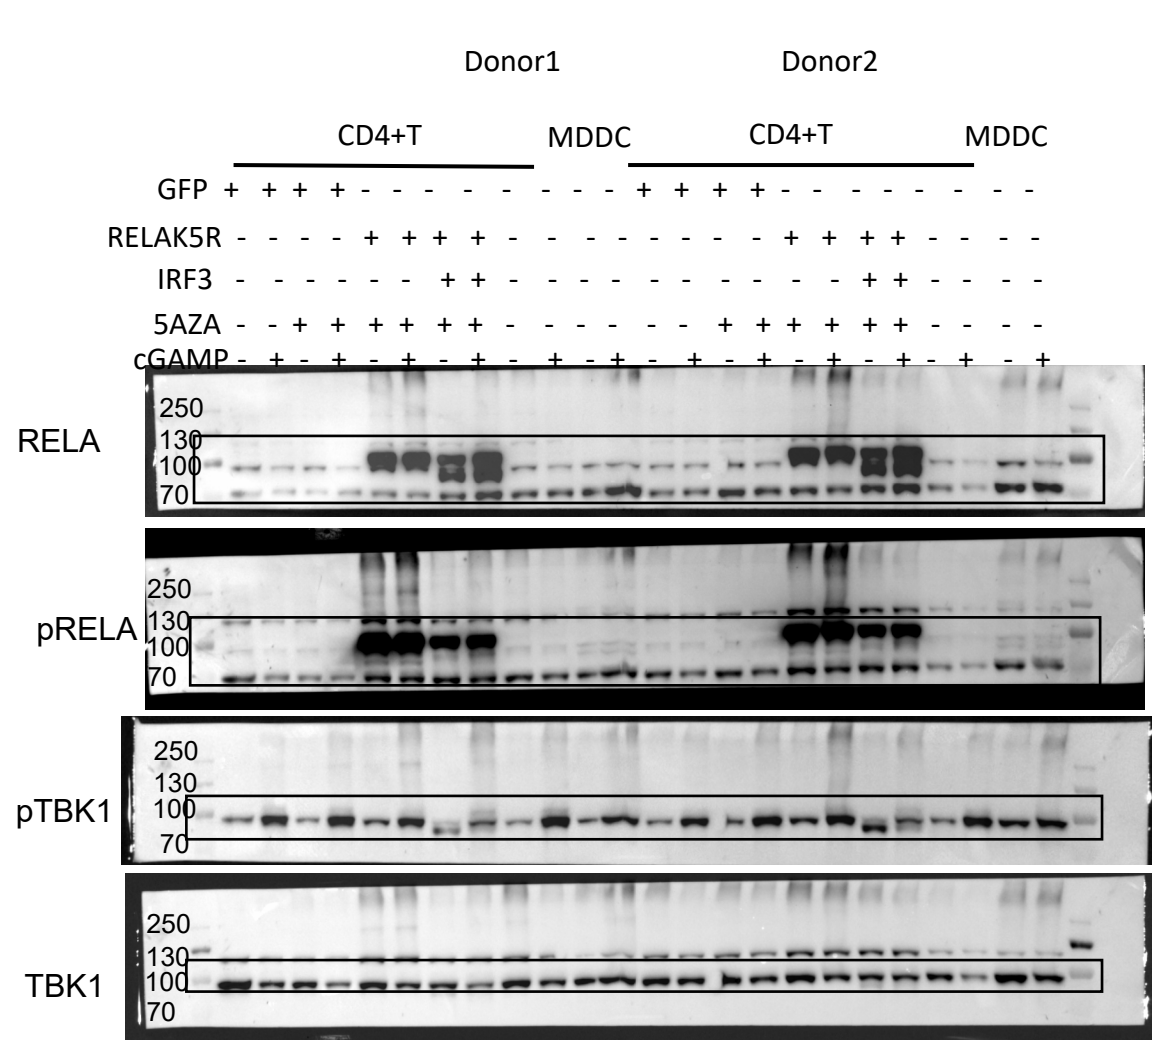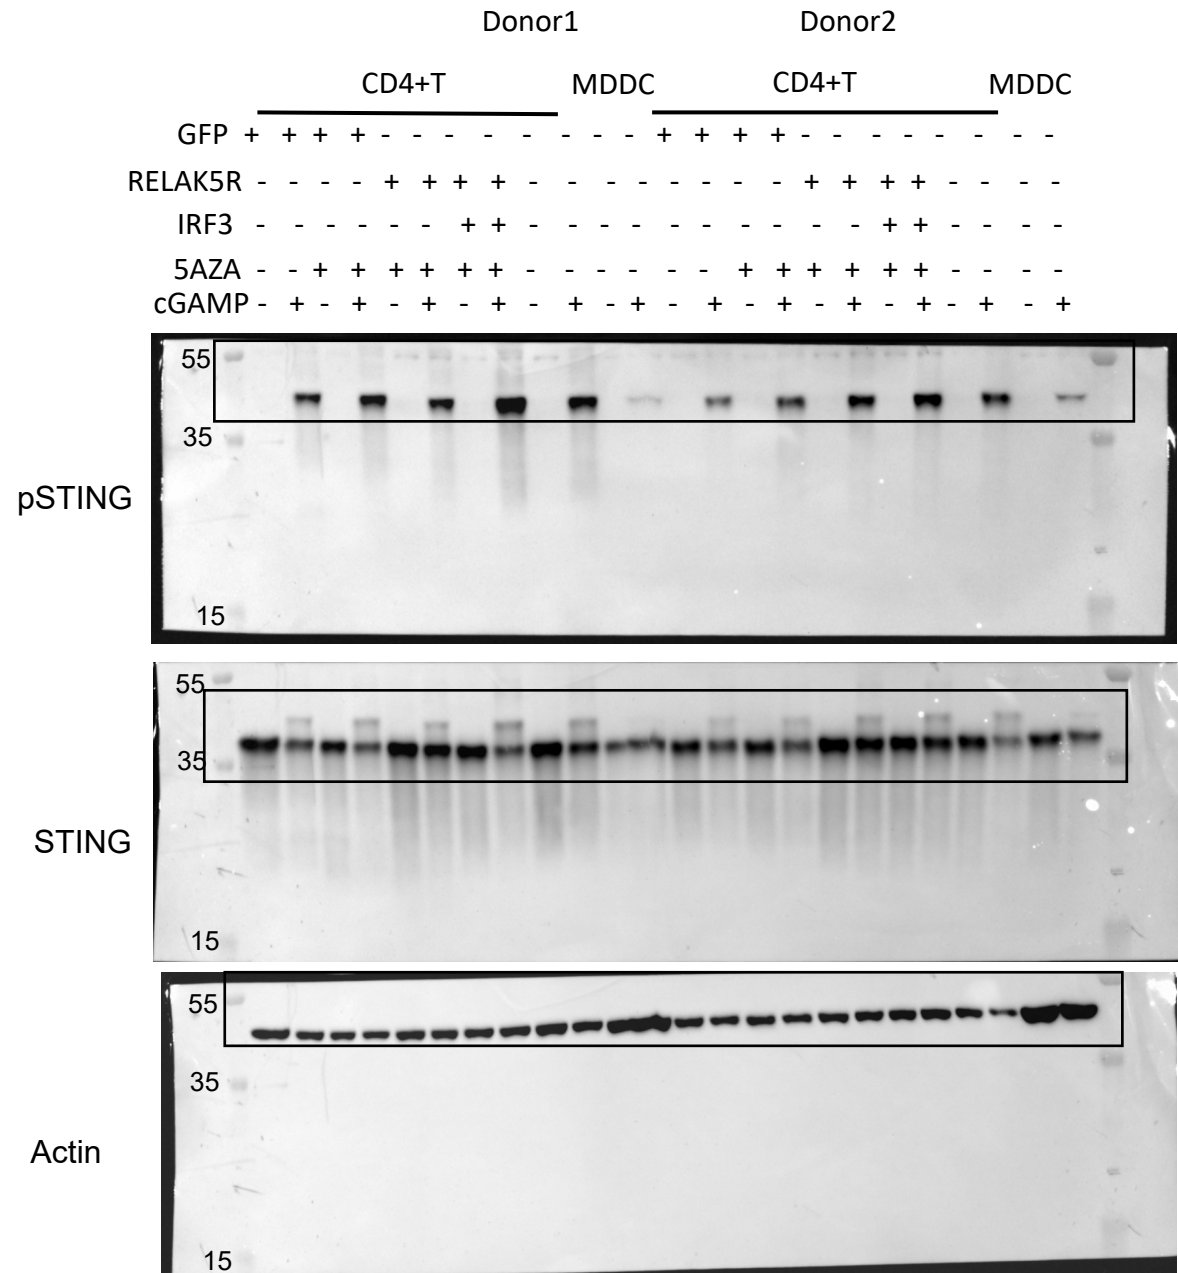

SourceDataSF4A

|         | Donor1 |   |      |   | Donor2 |   |      |   |   |   |   |   |   |   |   |   |
|---------|--------|---|------|---|--------|---|------|---|---|---|---|---|---|---|---|---|
|         | CD4+T  |   | MDDC |   | CD4+T  |   | MDDC |   |   |   |   |   |   |   |   |   |
| GFP     | +      | + | +    | + | -      | - | -    | - | + | + | + | + | - | - | - | - |
| RELAK5R | -      | - | -    | + | +      | + | +    | + | - | - | - | + | + | + | + | + |
| IRF3    | -      | - | -    | - | +      | + | -    | - | - | - | - | + | + | - | - | - |
| 5AZA    | -      | - | +    | + | +      | + | +    | + | - | - | - | + | + | + | + | + |
| cGAMP   | -      | + | -    | + | -      | + | -    | + | - | + | - | + | - | + | - | + |

|         | Donor1 |   |      |   | Donor2 |   |      |   |   |   |   |   |   |   |   |   |
|---------|--------|---|------|---|--------|---|------|---|---|---|---|---|---|---|---|---|
|         | CD4+T  |   | MDDC |   | CD4+T  |   | MDDC |   |   |   |   |   |   |   |   |   |
| GFP     | +      | + | +    | + | -      | - | -    | - | + | + | + | + | - | - | - | - |
| RELAK5R | -      | - | -    | + | +      | + | +    | + | - | - | - | + | + | + | + | + |
| IRF3    | -      | - | -    | - | +      | + | -    | - | - | - | - | + | + | - | - | - |
| 5AZA    | -      | - | +    | + | +      | + | +    | + | - | - | - | + | + | + | + | + |
| cGAMP   | -      | + | -    | + | -      | + | -    | + | - | + | - | + | - | + | - | + |

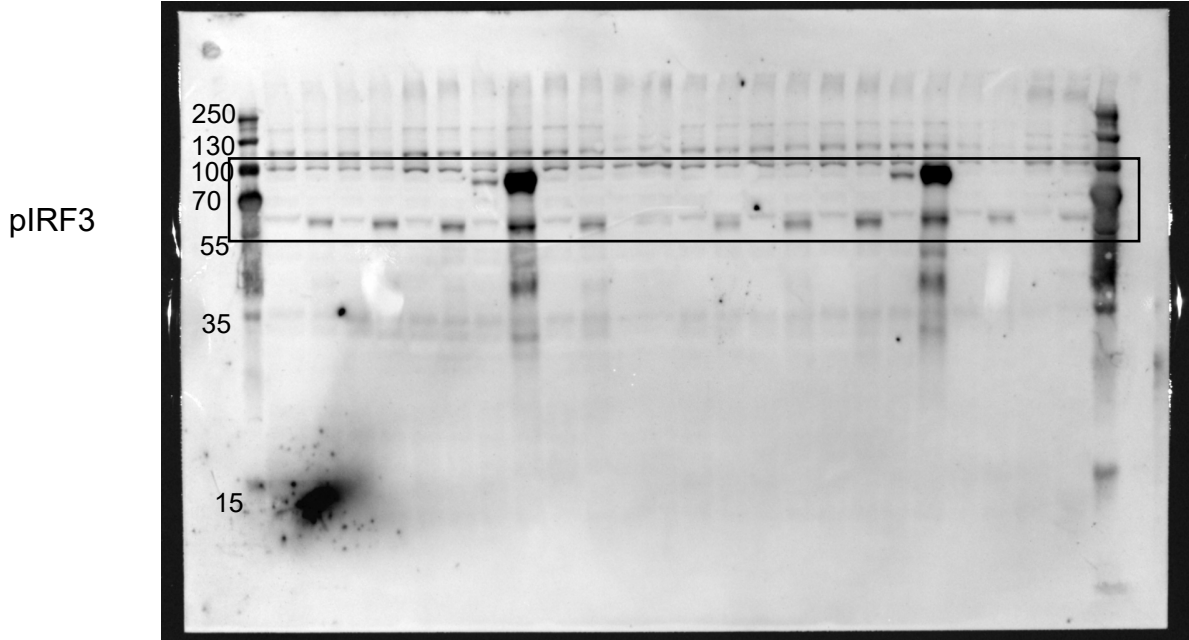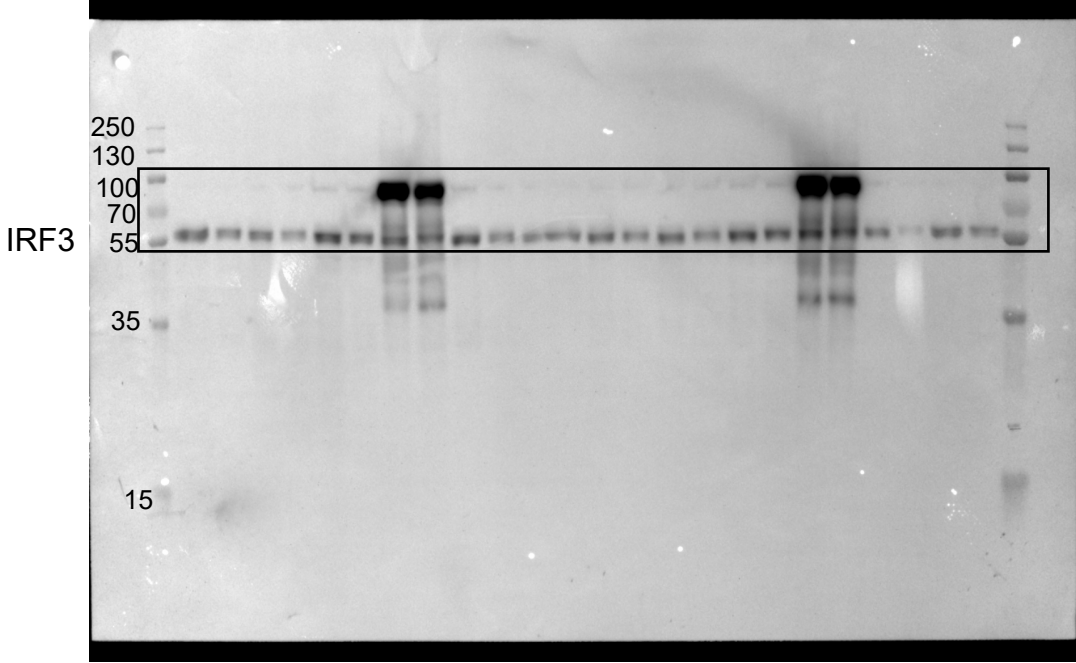

SourceDataSF4A

|         | Donor1 |   |   |   |      |   |   |   | Donor2 |   |   |   |      |   |   |   |   |   |   |   |   |   |   |   |
|---------|--------|---|---|---|------|---|---|---|--------|---|---|---|------|---|---|---|---|---|---|---|---|---|---|---|
|         | CD4+T  |   |   |   | MDDC |   |   |   | CD4+T  |   |   |   | MDDC |   |   |   |   |   |   |   |   |   |   |   |
| GFP     | +      | + | + | + | -    | - | - | - | -      | - | - | - | +    | + | + | + | - | - | - | - |   |   |   |   |
| RELAK5R | -      | - | - | - | +    | + | + | + | -      | - | - | - | -    | - | + | + | + | + | - | - | - | - |   |   |
| IRF3    | -      | - | - | - | -    | - | + | + | -      | - | - | - | -    | - | - | + | + | - | - | - | - |   |   |   |
| 5AZA    | -      | - | + | + | +    | + | + | + | -      | - | - | - | -    | - | + | + | + | + | + | + | - | - | - | - |
| cGAMP   | -      | + | - | + | -    | + | - | + | -      | + | - | + | -    | + | - | + | - | + | - | + | - | + | - | + |

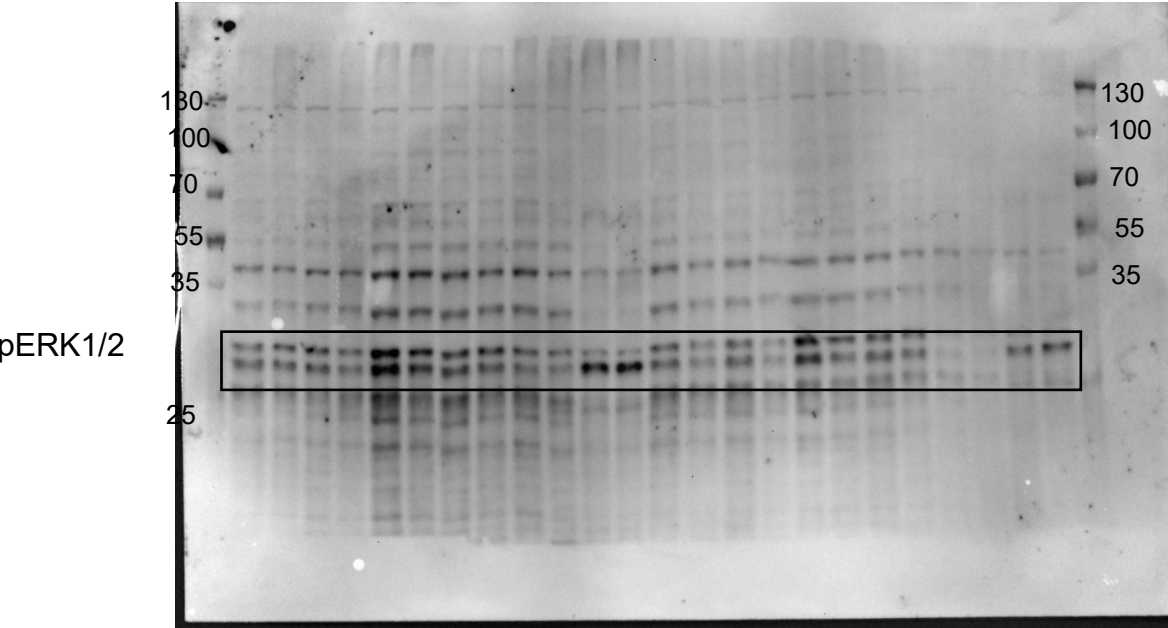

|         | Donor1 |   |   |   |      |   |   |   | Donor2 |   |   |   |      |   |   |   |   |   |   |   |   |   |   |   |
|---------|--------|---|---|---|------|---|---|---|--------|---|---|---|------|---|---|---|---|---|---|---|---|---|---|---|
|         | CD4+T  |   |   |   | MDDC |   |   |   | CD4+T  |   |   |   | MDDC |   |   |   |   |   |   |   |   |   |   |   |
| GFP     | +      | + | + | + | -    | - | - | - | -      | - | - | - | +    | + | + | + | - | - | - | - |   |   |   |   |
| RELAK5R | -      | - | - | - | +    | + | + | + | -      | - | - | - | -    | - | + | + | + | + | - | - | - | - |   |   |
| IRF3    | -      | - | - | - | -    | - | + | + | -      | - | - | - | -    | - | - | + | + | - | - | - | - |   |   |   |
| 5AZA    | -      | - | + | + | +    | + | + | + | -      | - | - | - | -    | - | + | + | + | + | + | + | - | - | - | - |
| cGAMP   | -      | + | - | + | -    | + | - | + | -      | + | - | + | -    | + | - | + | - | + | - | + | - | + | - | + |

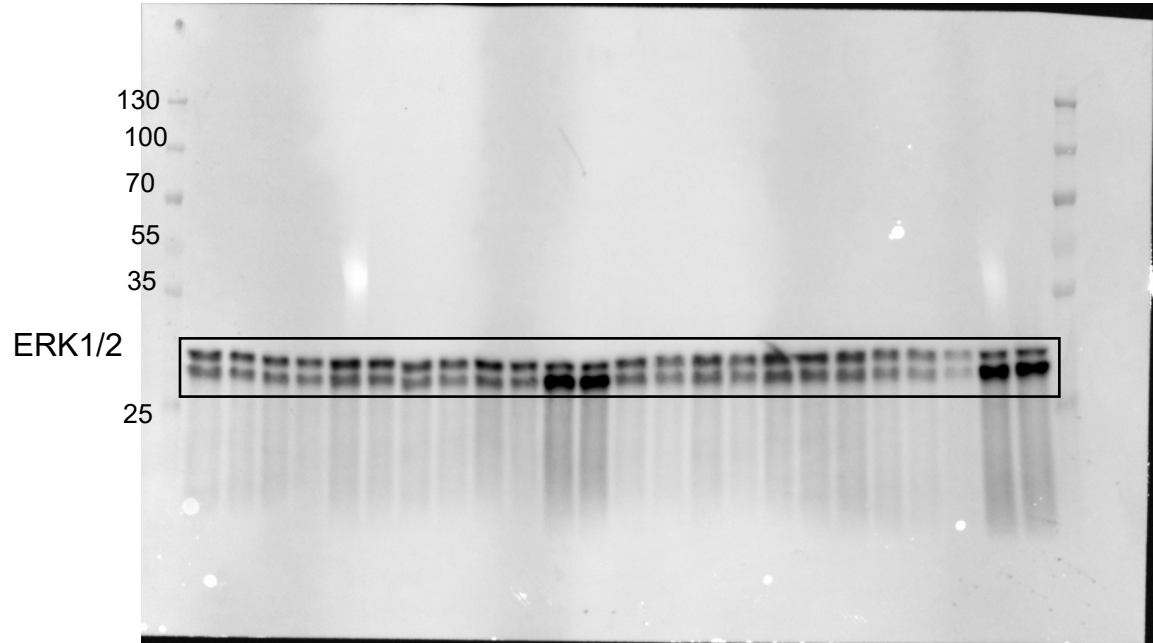

SourceDataSF4C

|           |   |   |   |   |   |   |   |   |   |   |   |   |   |   |    |   |
|-----------|---|---|---|---|---|---|---|---|---|---|---|---|---|---|----|---|
| IRF3+RELA | - | - | - | + | + | - | - | - | - | - | - | + | + | - | ++ | - |
| AZT+NVP   | - | - | + | - | - | + | - | - | + | - | - | + | + | - | +  | + |
| 5AZA      | - | + | + | - | + | + | - | + | + | - | + | + | - | + | +  | + |

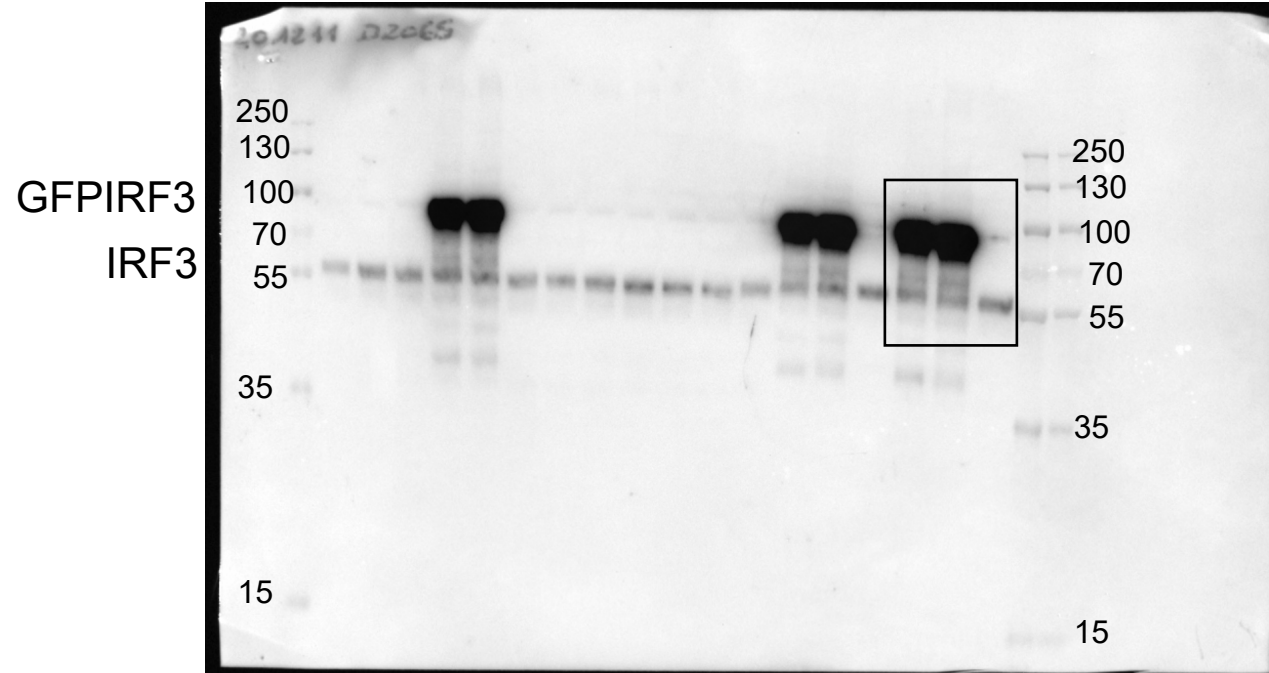

|           |   |   |   |   |   |   |   |   |   |   |   |   |   |   |    |   |
|-----------|---|---|---|---|---|---|---|---|---|---|---|---|---|---|----|---|
| IRF3+RELA | - | - | - | + | + | - | - | - | - | - | - | + | + | - | ++ | - |
| AZT+NVP   | - | - | + | - | - | + | - | - | + | - | - | + | + | - | +  | + |
| 5AZA      | - | + | + | - | + | + | - | + | + | - | + | + | - | + | +  | + |

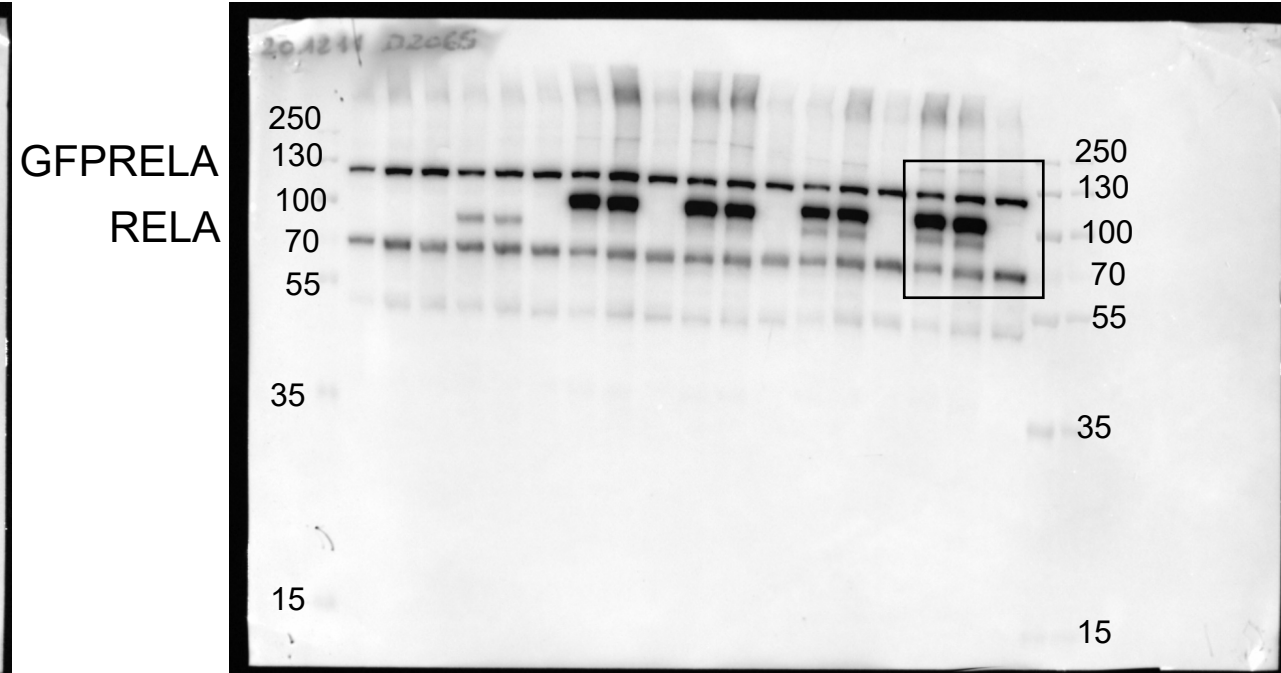

SourceDataSF4C

|             |   |    |   |   |   |   |   |   |   |   |   |   |   |   |    |   |   |
|-------------|---|----|---|---|---|---|---|---|---|---|---|---|---|---|----|---|---|
| IRF3+RELA5R | - | -  | - | + | + | - | - | - | - | - | - | + | + | - | ++ | - |   |
| AZT+NVP     | - | -  | + | - | - | + | - | - | + | - | + | + | - | + | +  |   |   |
| 5AZA        | - | ++ | - | + | + | - | + | + | - | + | + | - | + | + | -  | + | + |

|             |   |    |   |   |   |   |   |   |   |   |   |   |   |   |    |   |   |
|-------------|---|----|---|---|---|---|---|---|---|---|---|---|---|---|----|---|---|
| IRF3+RELA5R | - | -  | - | + | + | - | - | - | - | - | - | + | + | - | ++ | - |   |
| AZT+NVP     | - | -  | + | - | - | + | - | + | - | + | - | + | + | - | +  | + |   |
| 5AZA        | - | ++ | - | + | + | - | + | + | - | + | + | - | + | + | -  | + | + |

IRF7

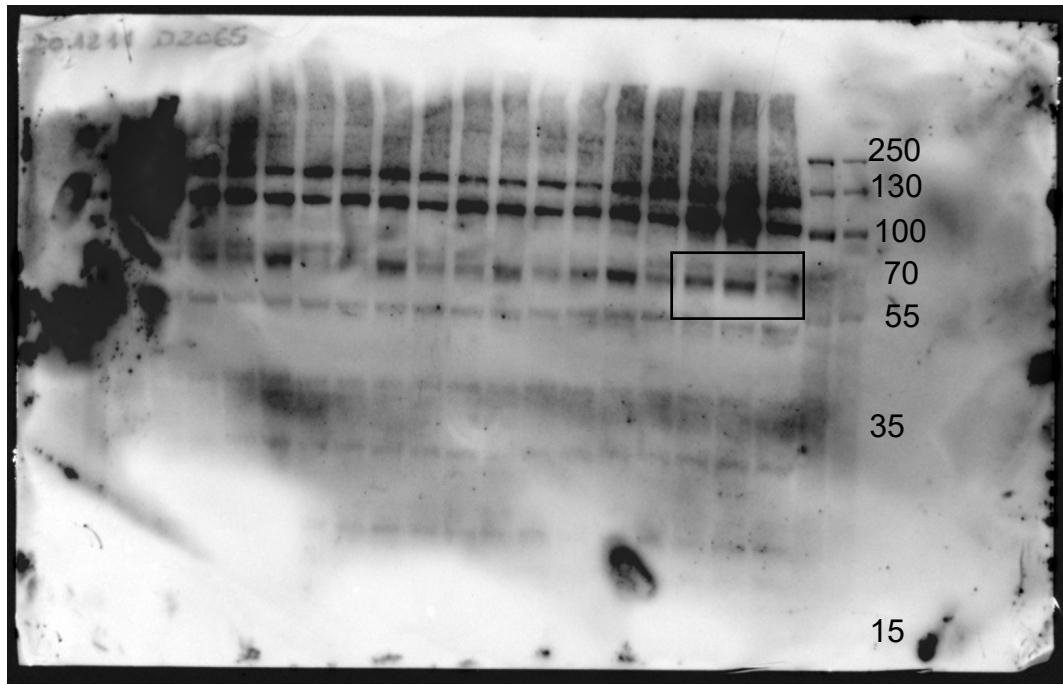

Actin

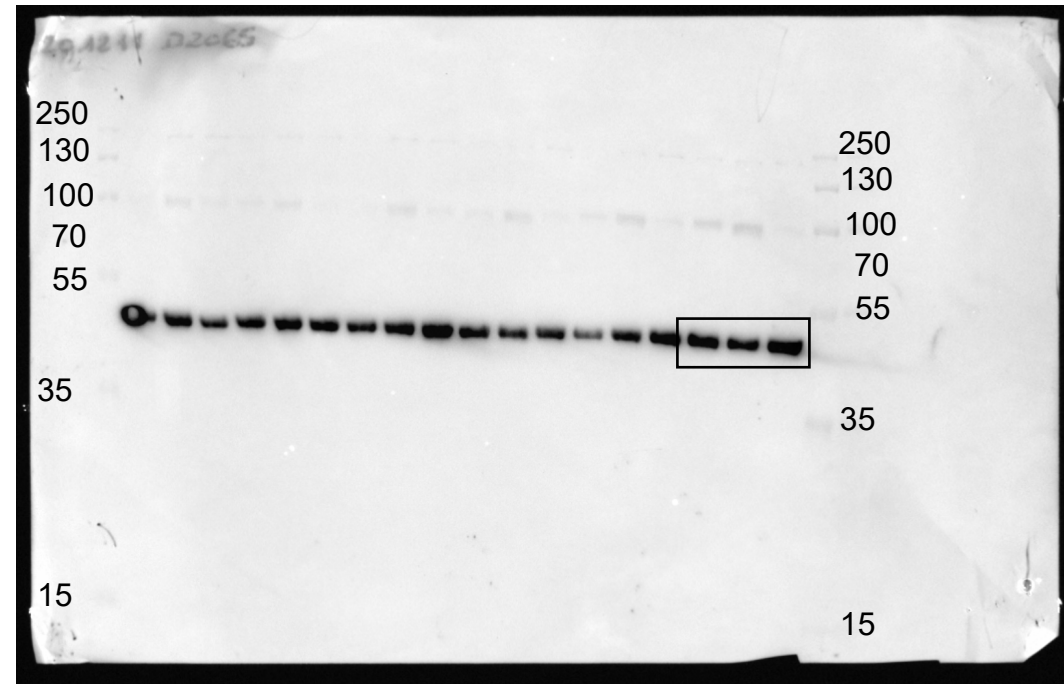

Supplement: JEM_20220666_SourceDataFS4.pdf [file JEM_20220666_SourceDataFS4.pdf]
