# Supplementary material for: RELA tunes innate-like interferon I/III responses in human T cells
Source: PubMed Central journal article supplement — J Exp Med. 2023 Feb 23;220(5):e20220666. doi: 10.1084/jem.20220666 (PMC9998965; doi:10.1084/jem.20220666), 2023-02-23

SourceDataF1C

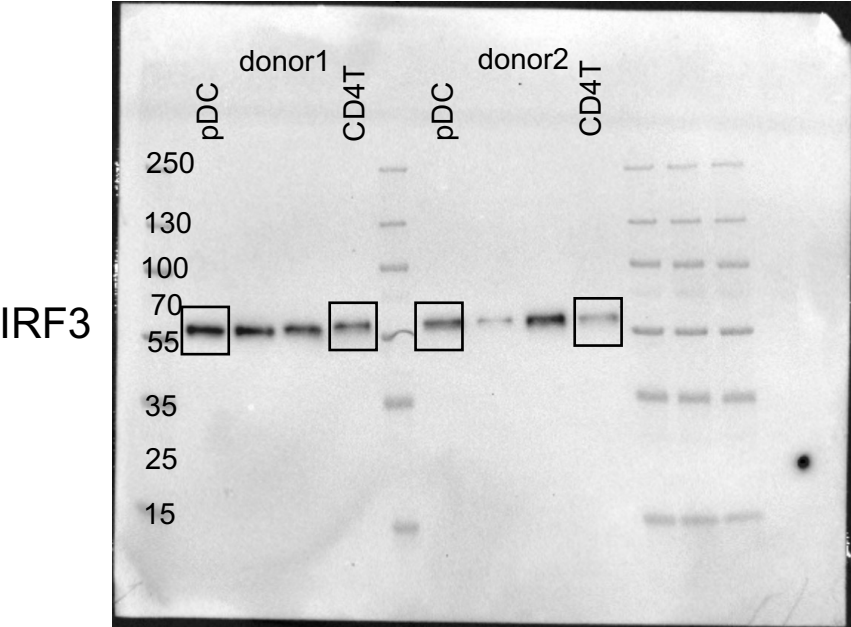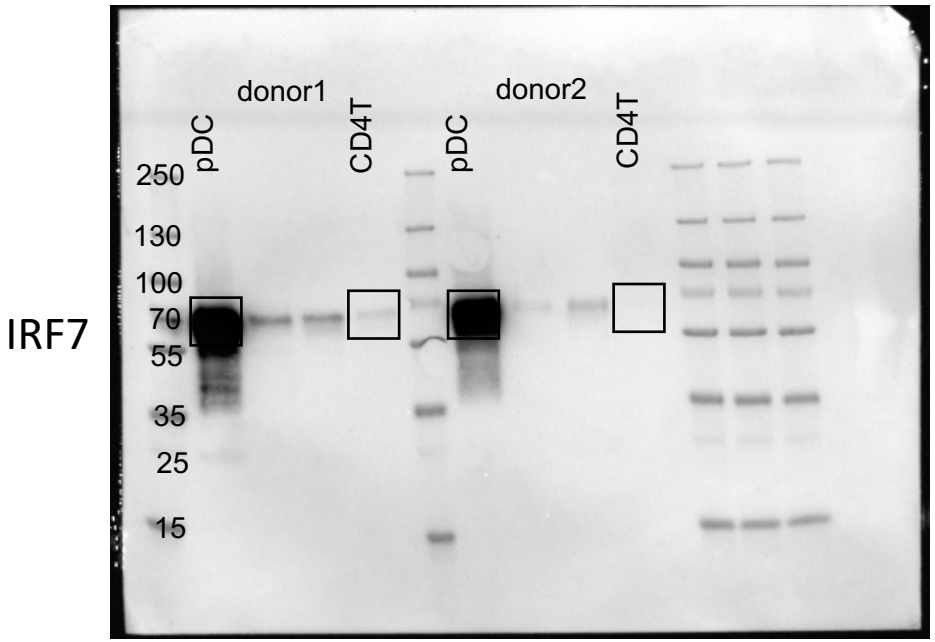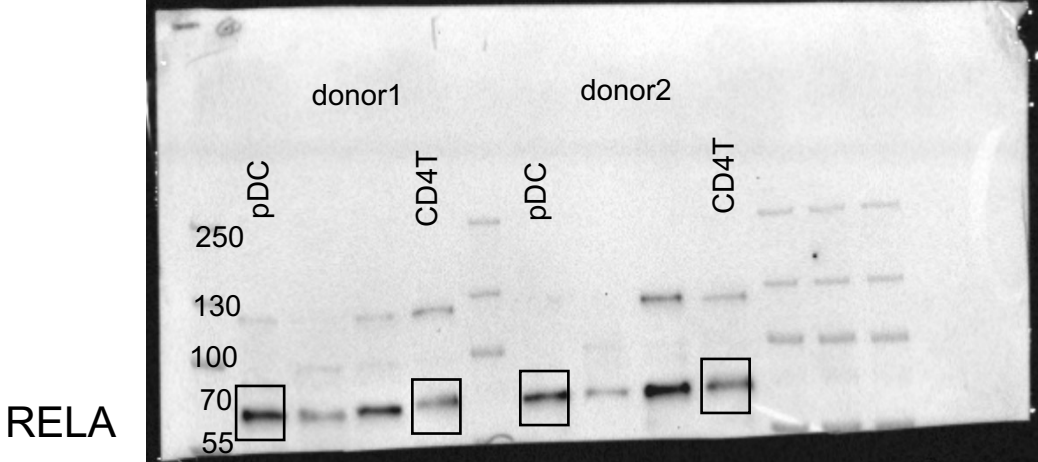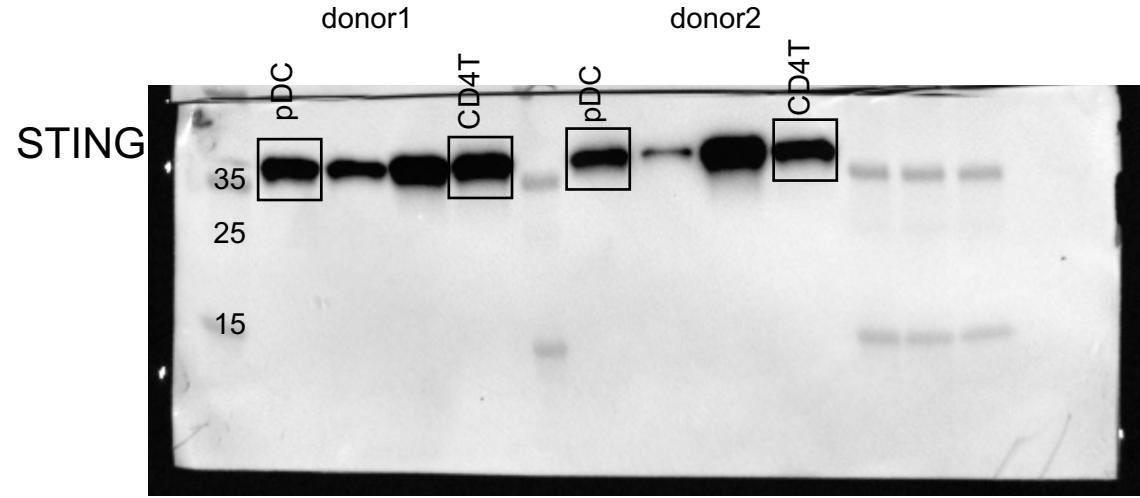

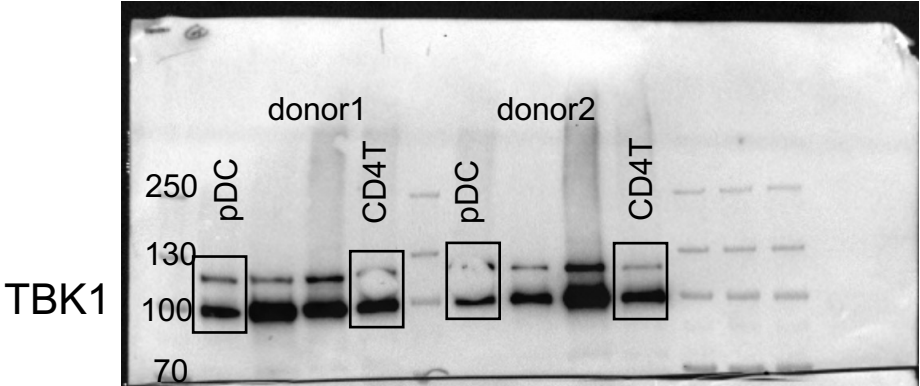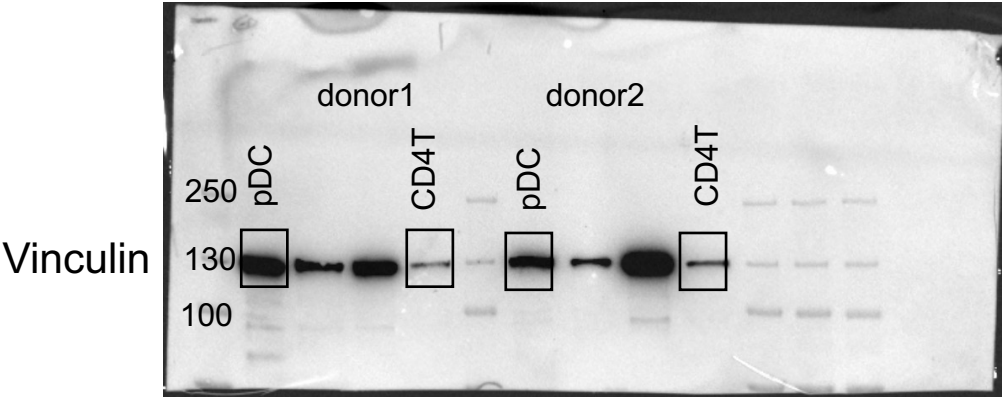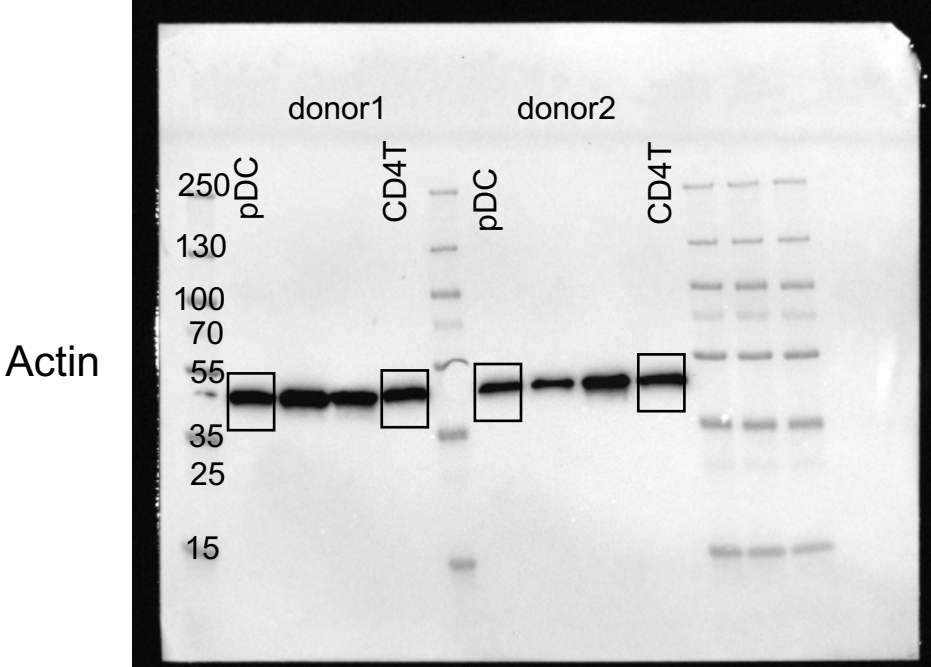

|       | donor1 |   |      |   | donor2 |   |      |   |
|-------|--------|---|------|---|--------|---|------|---|
|       | CD4T   |   | MDDC |   | CD4T   |   | MDDC |   |
| cGAMP | -      | + | -    | + | -      | + | -    | + |

pSTING

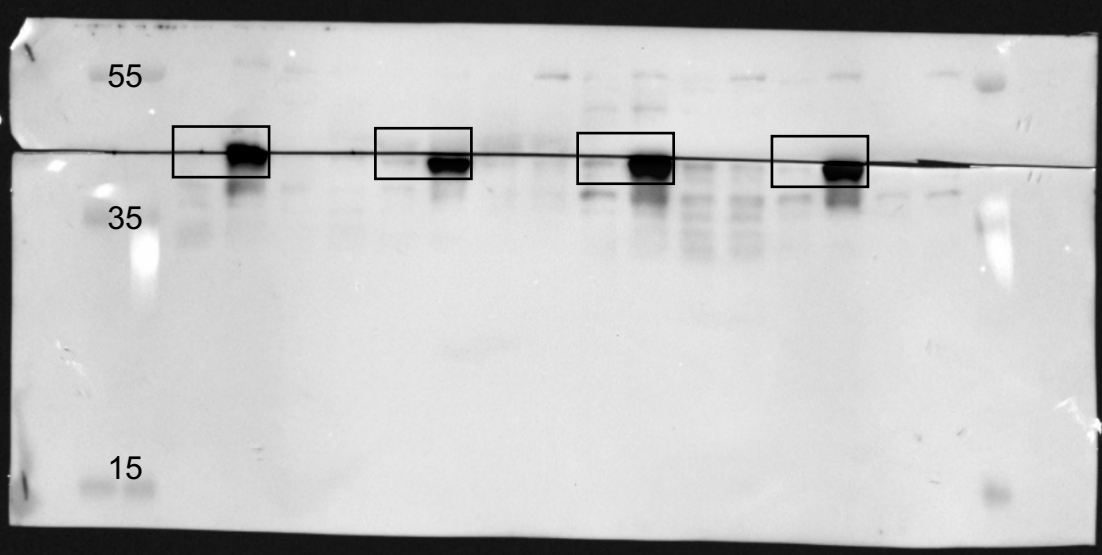

|       | donor1 |   |      |   | donor2 |   |      |   |
|-------|--------|---|------|---|--------|---|------|---|
|       | CD4T   |   | MDDC |   | CD4T   |   | MDDC |   |
| cGAMP | -      | + | -    | + | -      | + | -    | + |

STING

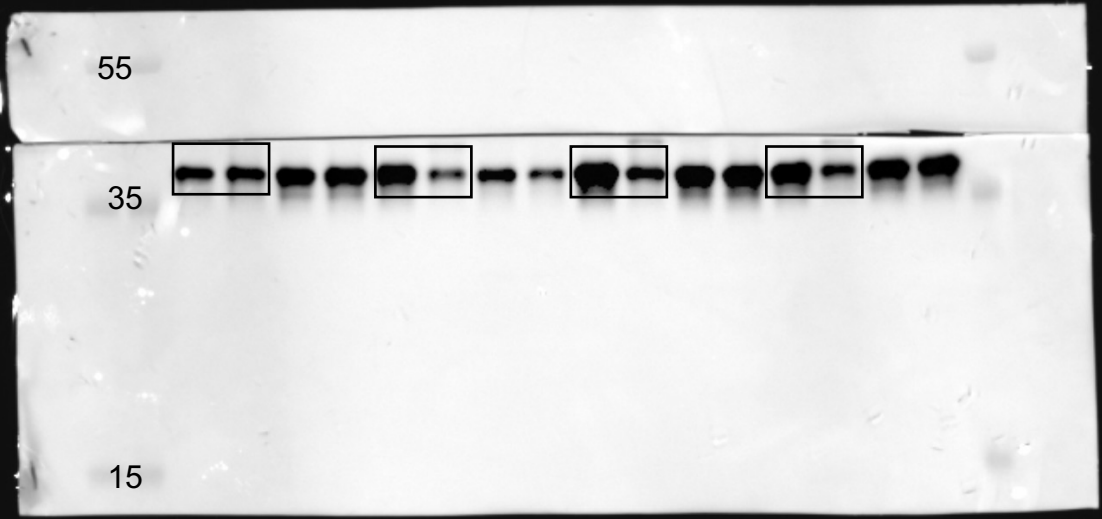

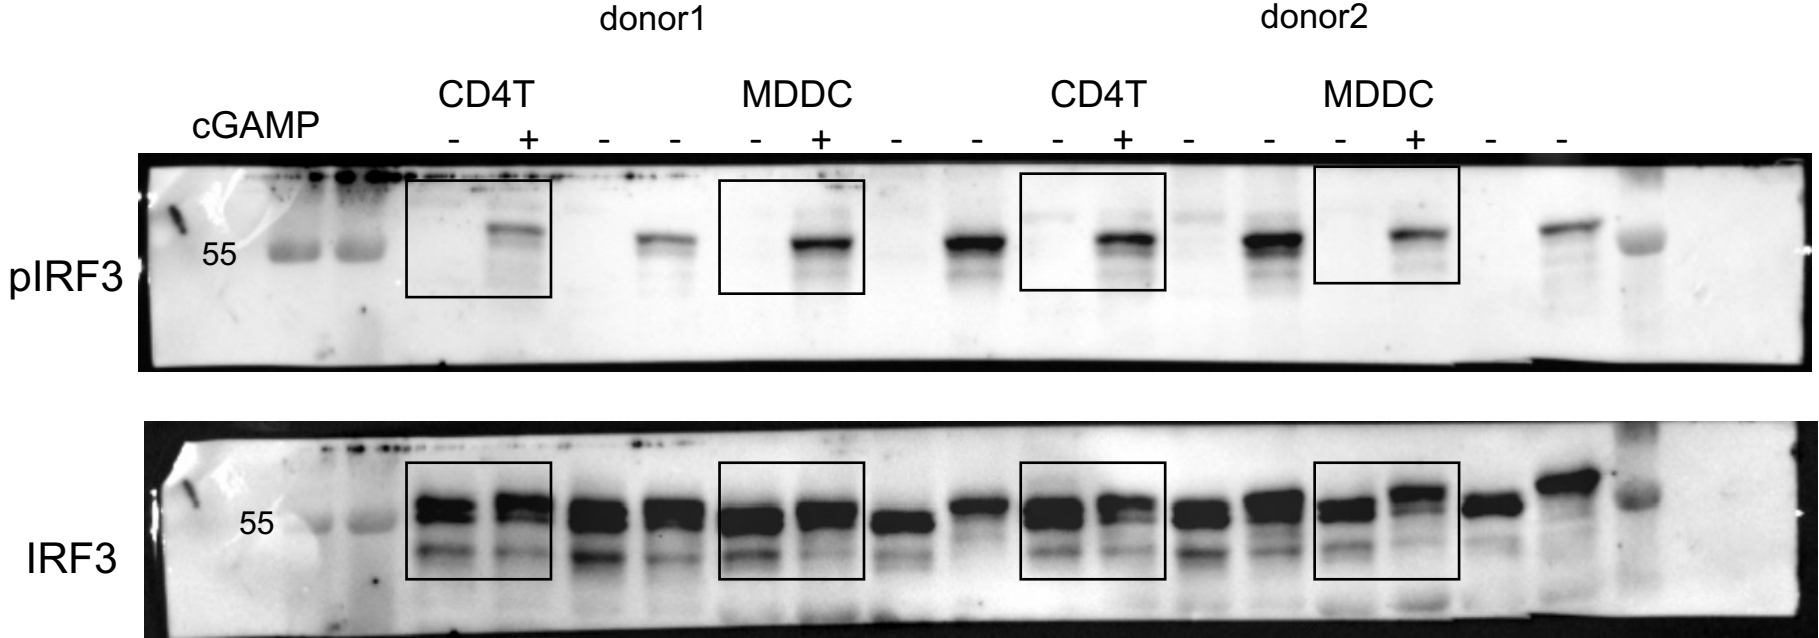

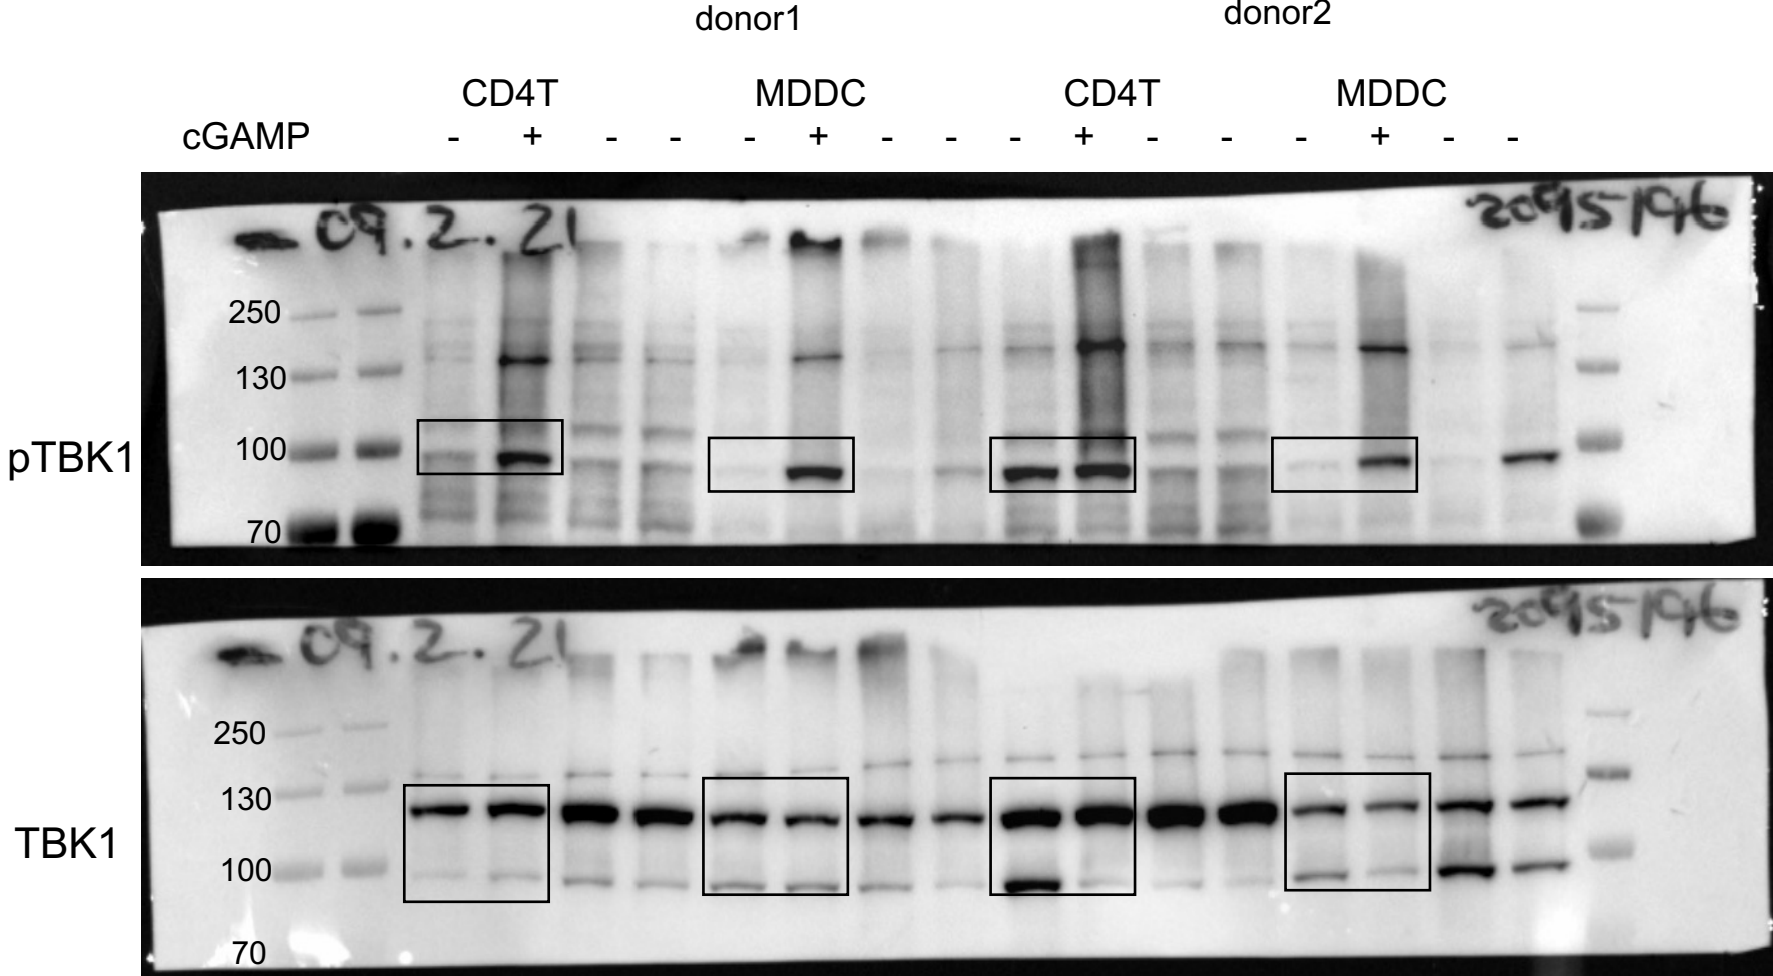

Supplement: JEM_20220666_SourceDataF1.pdf [file JEM_20220666_SourceDataF1.pdf]
