# Supplementary material for: RELA tunes innate-like interferon I/III responses in human T cells
Source: PubMed Central journal article supplement — J Exp Med. 2023 Feb 23;220(5):e20220666. doi: 10.1084/jem.20220666 (PMC9998965; doi:10.1084/jem.20220666), 2023-02-23

|             | DONOR1 |   |      |   | DONOR2 |   |      |   |   |   |   |   |
|-------------|--------|---|------|---|--------|---|------|---|---|---|---|---|
|             | CD4T   |   | MDDC |   | CD4T   |   | MDDC |   |   |   |   |   |
| GFP-RELAK5R | -      | - | -    | + | -      | - | -    | + | - | - | - | + |
| GFP-RELAK5Q | -      | - | +    | - | -      | - | +    | - | - | - | + | - |
| GFP-RELA    | -      | + | -    | - | -      | + | -    | - | - | + | - | - |
| GFP         | +      | - | -    | - | +      | - | -    | - | + | - | - | - |

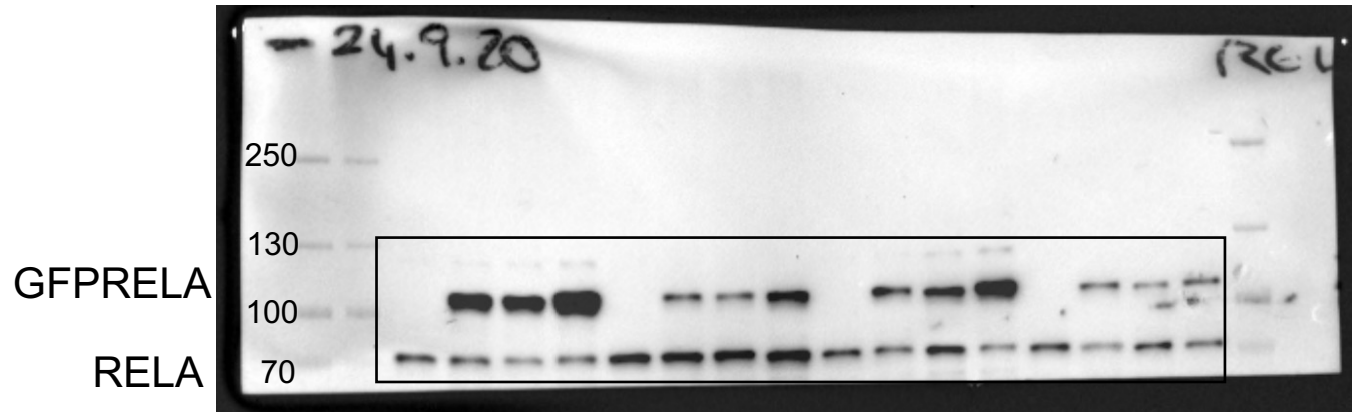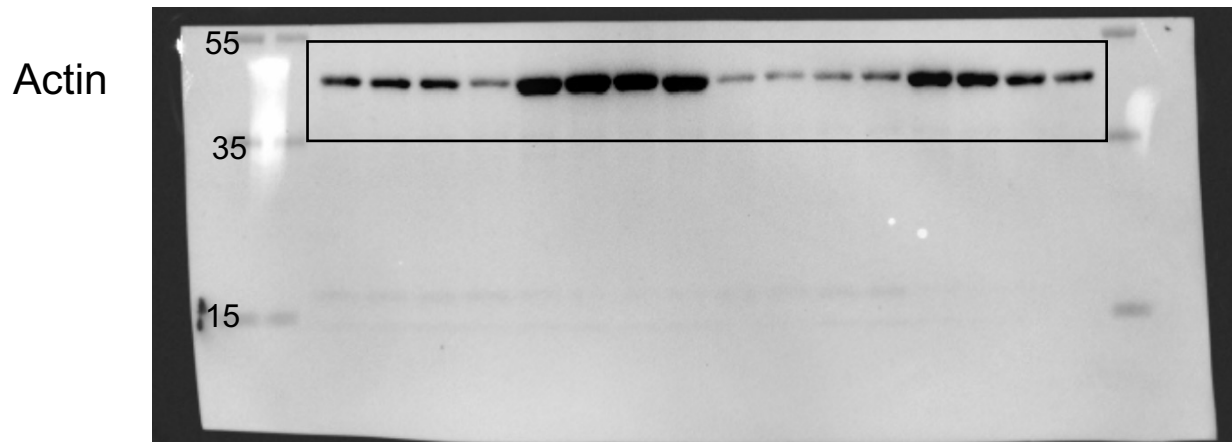

|               | Donor1 |   |   | Donor2 |   |   |   |   |
|---------------|--------|---|---|--------|---|---|---|---|
| GFPRELA K5R   | -      | - | - | +      | - | - | - | + |
| GFPRELA K310R | -      | - | + | -      | - | - | + | - |
| GFPRELA       | -      | + | - | -      | - | + | - | - |
| GFP           | +      | - | - | -      | + | - | - | - |

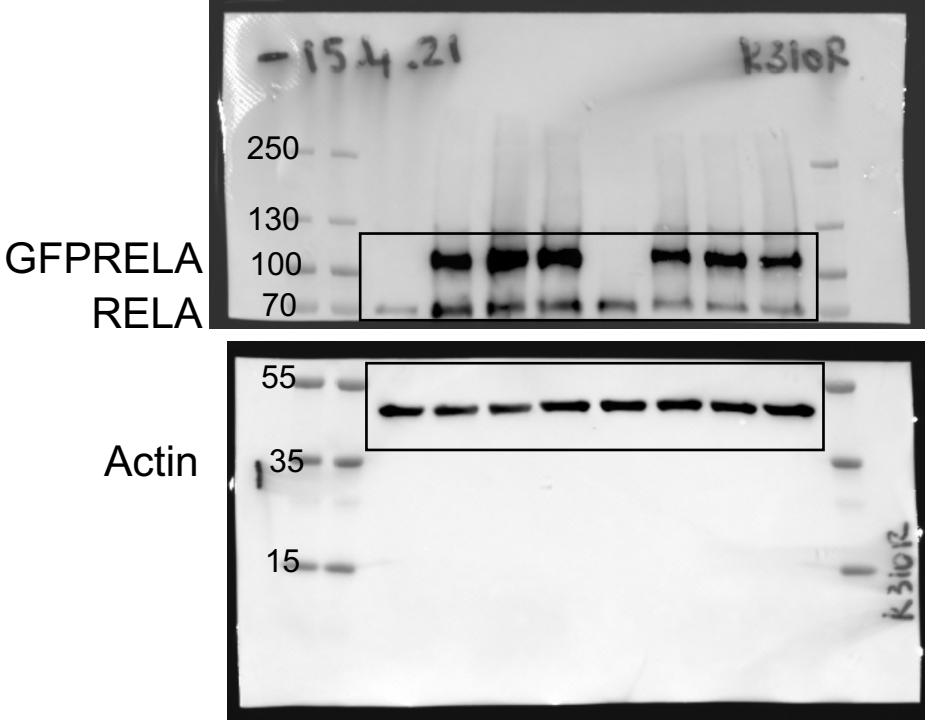

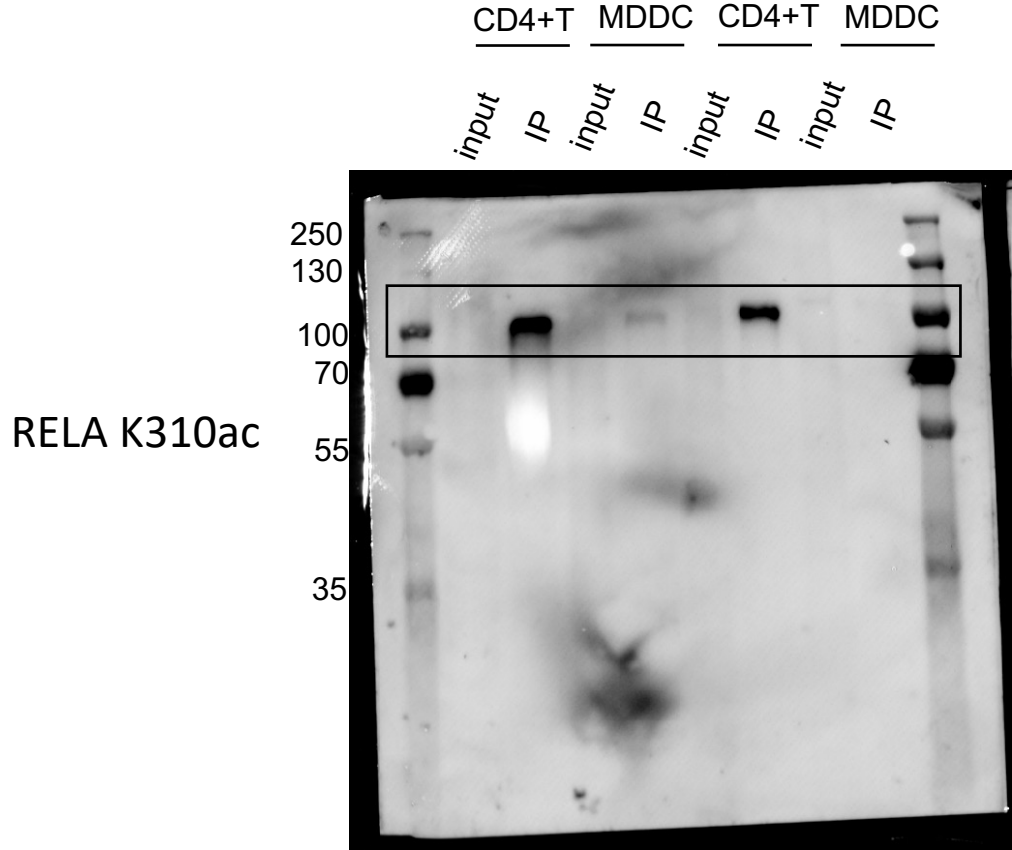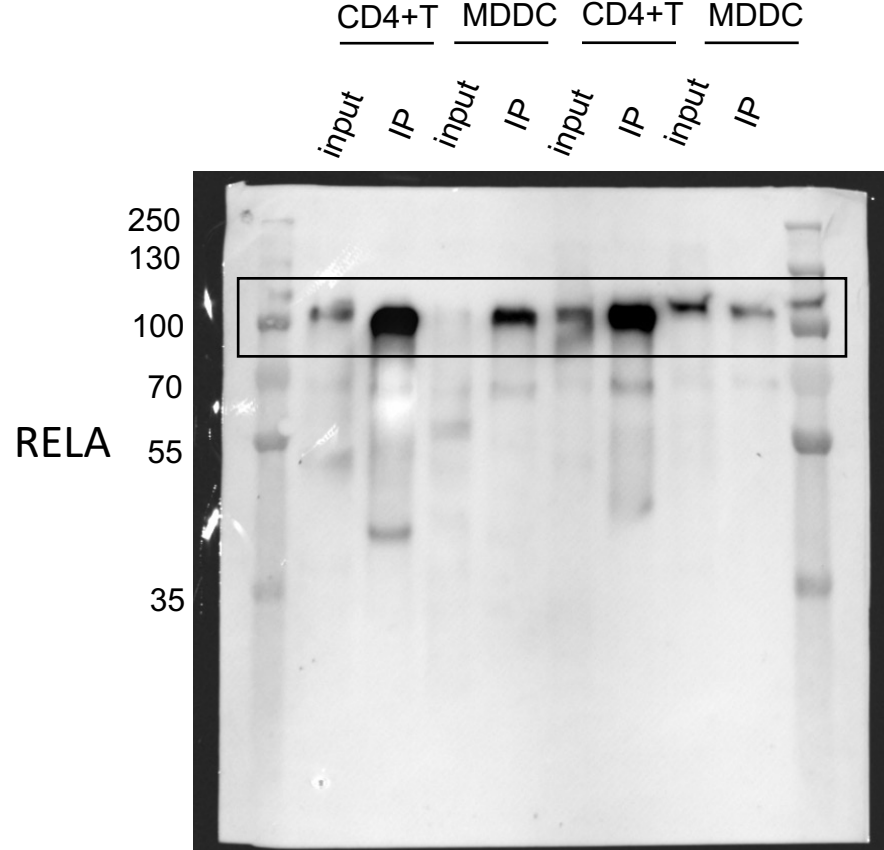

Supplement: JEM_20220666_SourceDataF2.pdf [file JEM_20220666_SourceDataF2.pdf]
