# Supplementary material for: RELA tunes innate-like interferon I/III responses in human T cells
Source: PubMed Central journal article supplement — J Exp Med. 2023 Feb 23;220(5):e20220666. doi: 10.1084/jem.20220666 (PMC9998965; doi:10.1084/jem.20220666), 2023-02-23

SourceDataF5B

donor1

donor2

|                 |   |   |   |   |   |   |   |   |   |   |   |   |   |   |   |   |   |   |   |   |   |   |
|-----------------|---|---|---|---|---|---|---|---|---|---|---|---|---|---|---|---|---|---|---|---|---|---|
| IFN $\alpha$ 2a | - | + | - | + | - | + | - | + | - | + | - | + | - | + | - | + | - | + | - | + | - | + |
| GFP             | + | + | - | - | + | + | - | - | + | + | - | - | + | + | - | - | + | + | - | - | + | + |
| RELA5R          | - | - | + | + | - | - | + | + | - | - | + | + | - | - | + | + | - | - | + | + | - | + |
| LacZsh          | + | + | + | + | - | - | - | - | - | - | - | + | + | + | + | - | - | - | - | - | - | - |
| IRF7sh1         | - | - | - | - | + | + | + | + | - | - | - | - | - | - | - | + | + | + | + | - | - | - |
| IRF7sh5         | - | - | - | - | - | - | - | - | + | + | + | + | - | - | - | - | - | - | - | + | + | + |

donor1

donor2

|                 |   |   |   |   |   |   |   |   |   |   |   |   |   |   |   |   |   |   |   |   |   |   |
|-----------------|---|---|---|---|---|---|---|---|---|---|---|---|---|---|---|---|---|---|---|---|---|---|
| IFN $\alpha$ 2a | - | + | - | + | - | + | - | + | - | + | - | + | - | + | - | + | - | + | - | + | - | + |
| GFP             | + | + | - | - | + | + | - | - | + | + | - | - | + | + | - | - | + | + | - | - | + | + |
| RELA5R          | - | - | + | + | - | - | + | + | - | - | + | + | - | - | + | + | - | - | + | + | - | + |
| LacZsh          | + | + | + | + | - | - | - | - | - | - | - | - | - | + | + | + | + | - | - | - | - | - |
| IRF7sh1         | - | - | - | - | + | + | + | + | - | - | - | - | - | - | - | - | - | - | - | + | + | + |
| IRF7sh5         | - | - | - | - | - | - | - | - | - | - | - | - | - | + | + | + | + | - | - | - | - | + |

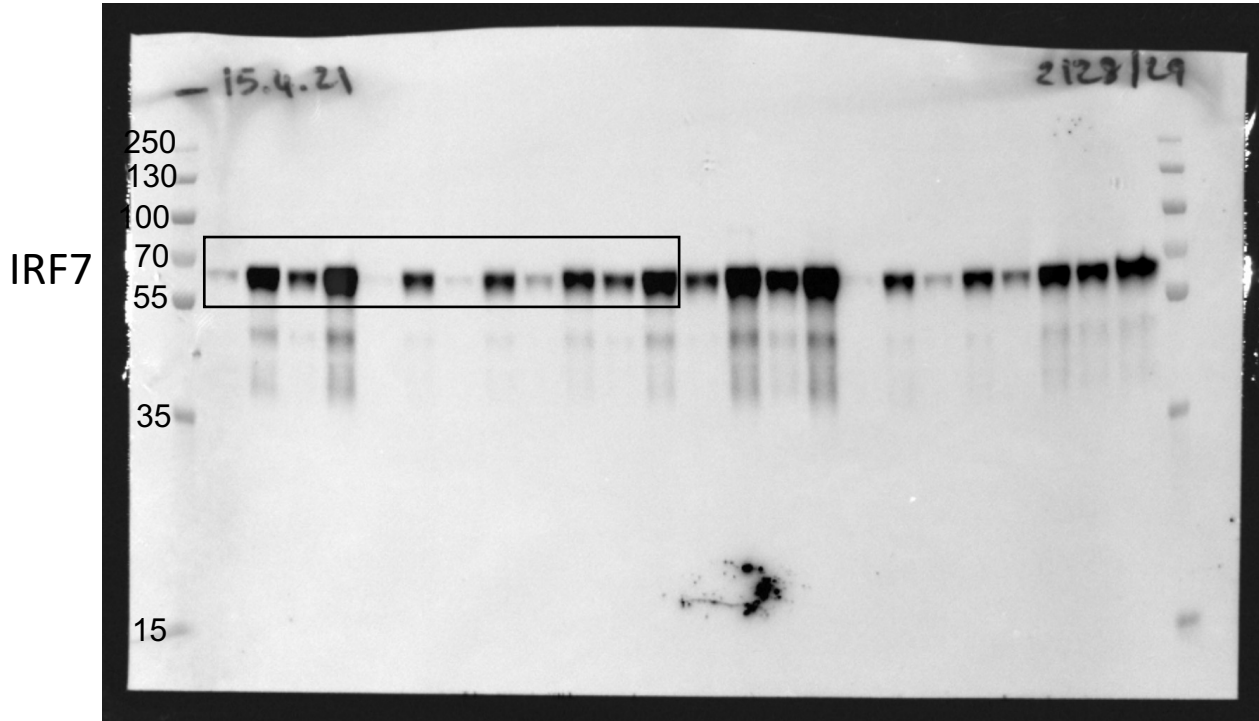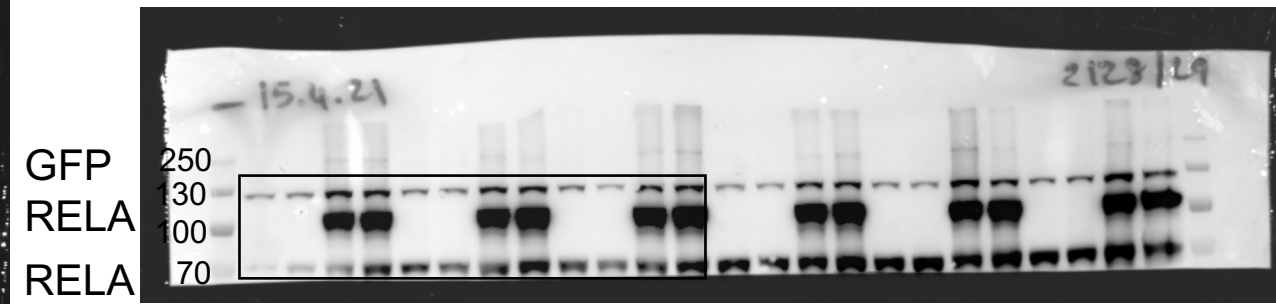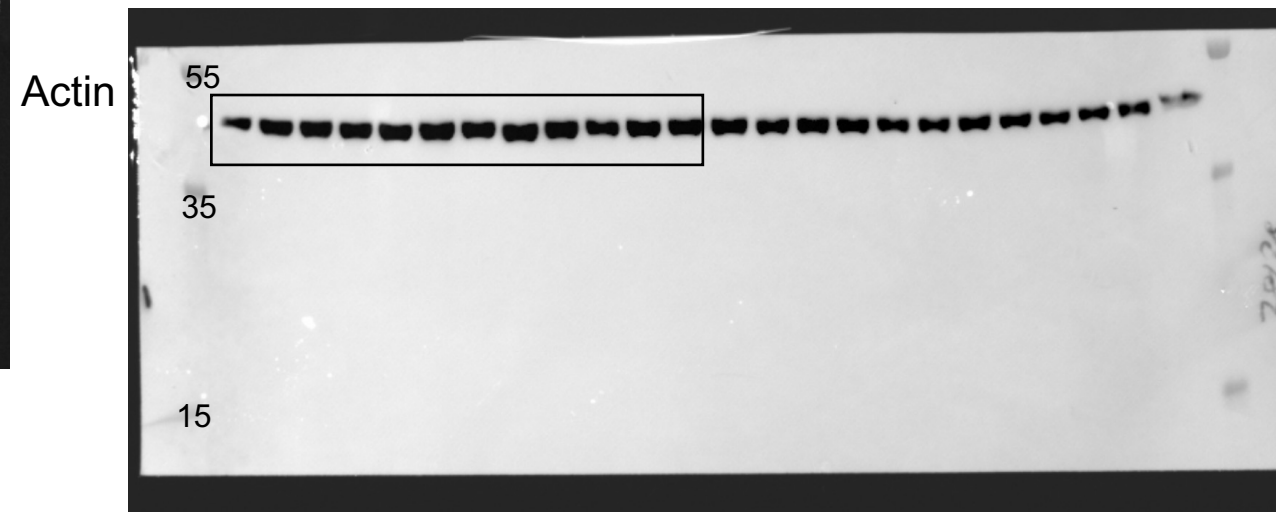

Supplement: JEM_20220666_SourceDataF5.pdf [file JEM_20220666_SourceDataF5.pdf]
