# Supplementary material for: RELA tunes innate-like interferon I/III responses in human T cells
Source: PubMed Central journal article supplement — J Exp Med. 2023 Feb 23;220(5):e20220666. doi: 10.1084/jem.20220666 (PMC9998965; doi:10.1084/jem.20220666), 2023-02-23

SourceDataF7D

A549

IFN $\alpha$  10000U/ml - - + - - +  
IFN $\alpha$  1000U/ml - + - - + -

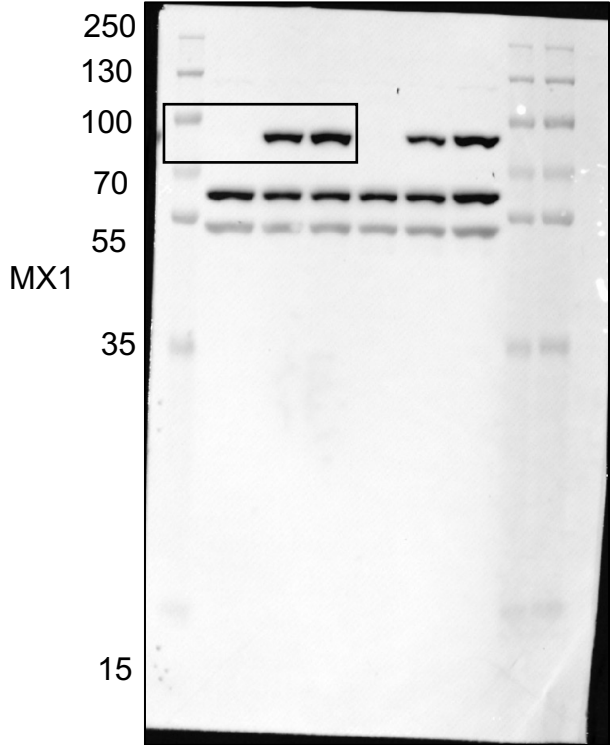

IFN $\alpha$  10000U/ml - - + - - +  
IFN $\alpha$  1000U/ml - + - - + -

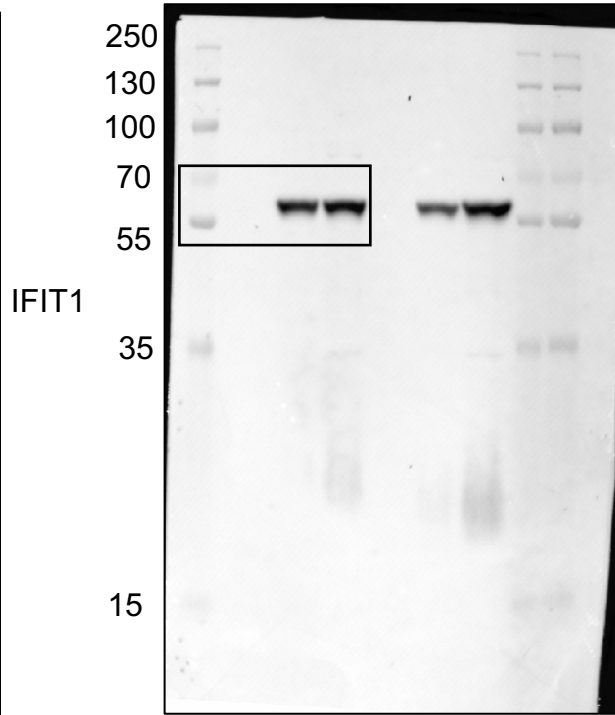

IFN $\alpha$  10000U/ml - - + - - +  
IFN $\alpha$  1000U/ml - + - - + -

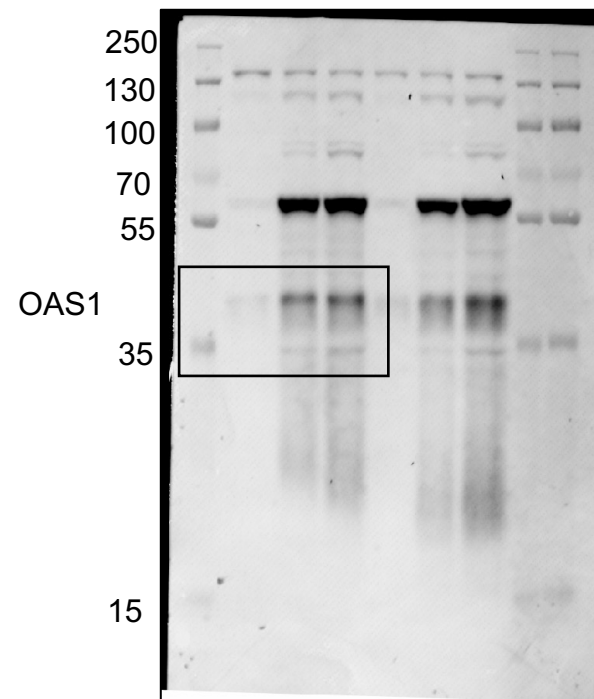

IFN $\alpha$  10000U/ml - - + - - +  
IFN $\alpha$  1000U/ml - + - - + -

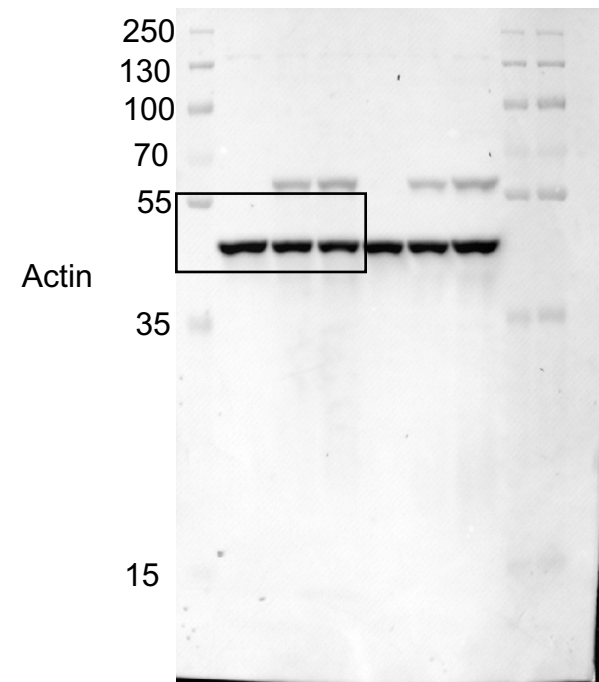

SourceDataF7D

T cells

IFNα 10000U/ml - - + - - + - - + - - + - - +  
IFNα 1000U/ml - + - - + - - + - - + - - + - - + -

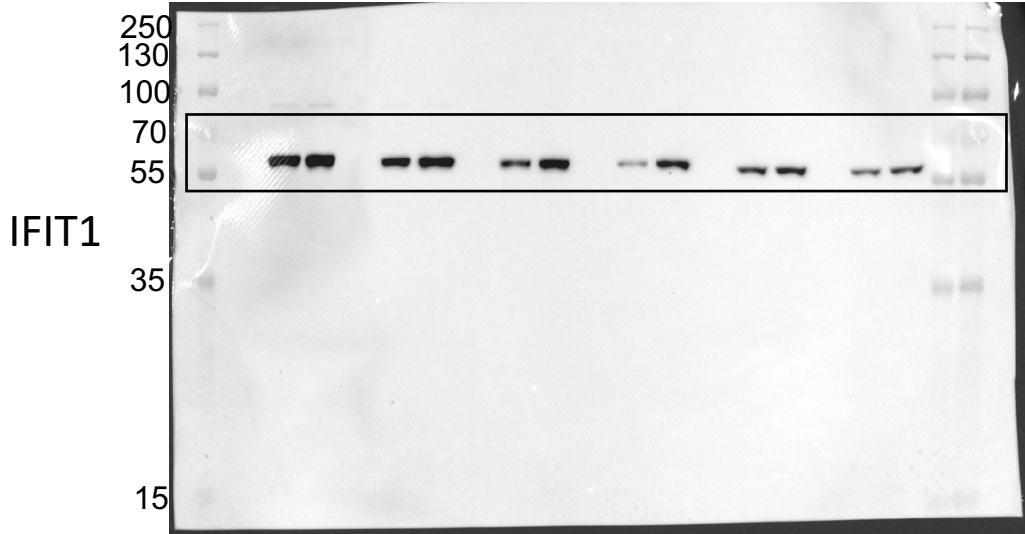

IFNα 10000U/ml - - + - - + - - + - - + - - + - - +  
IFNα 1000U/ml - + - - + - - + - - + - - + - - + -

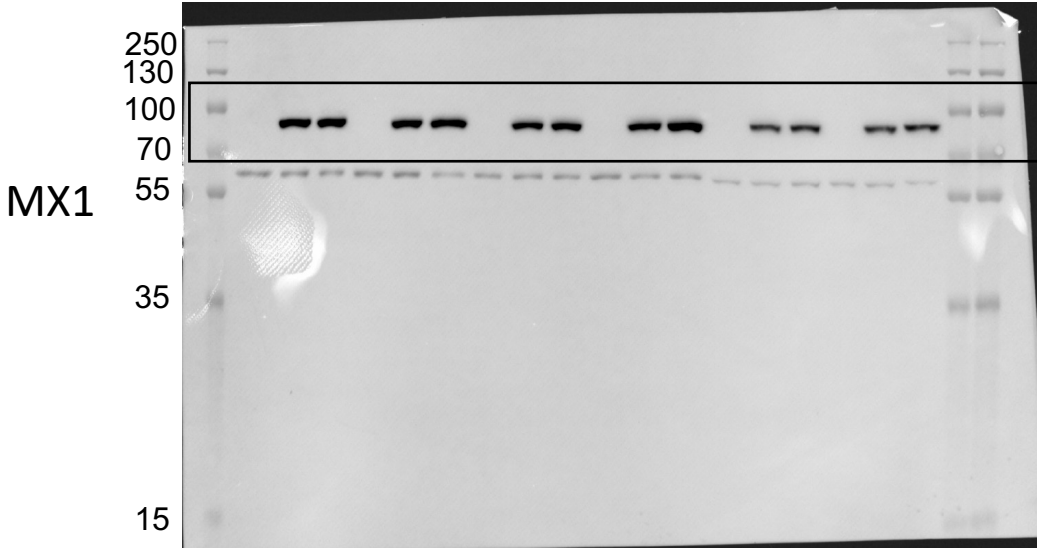

T cells

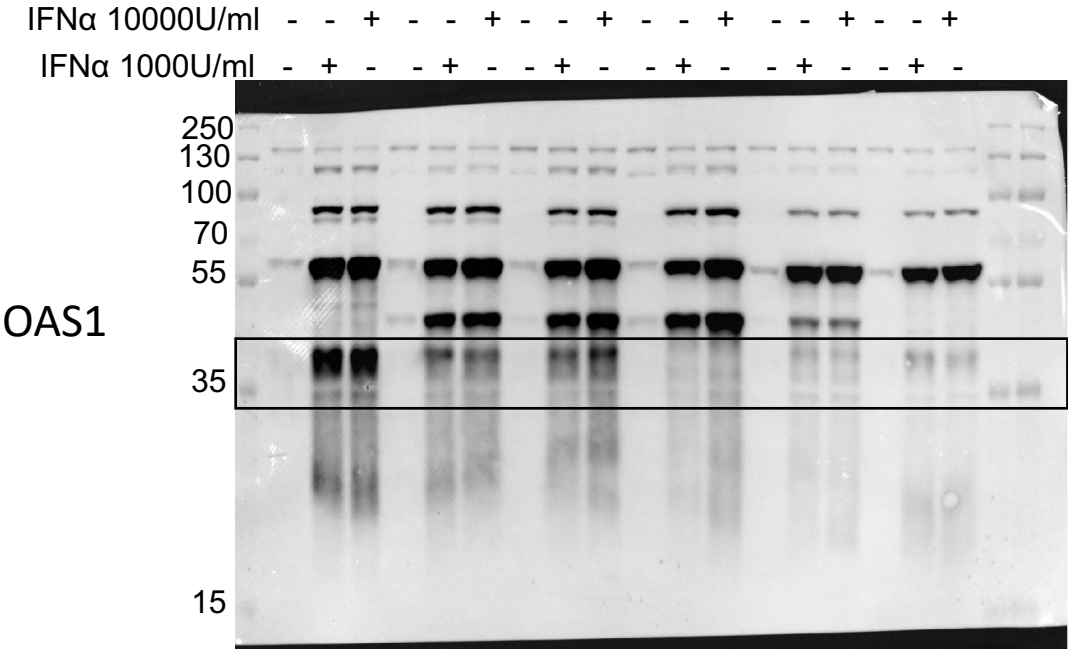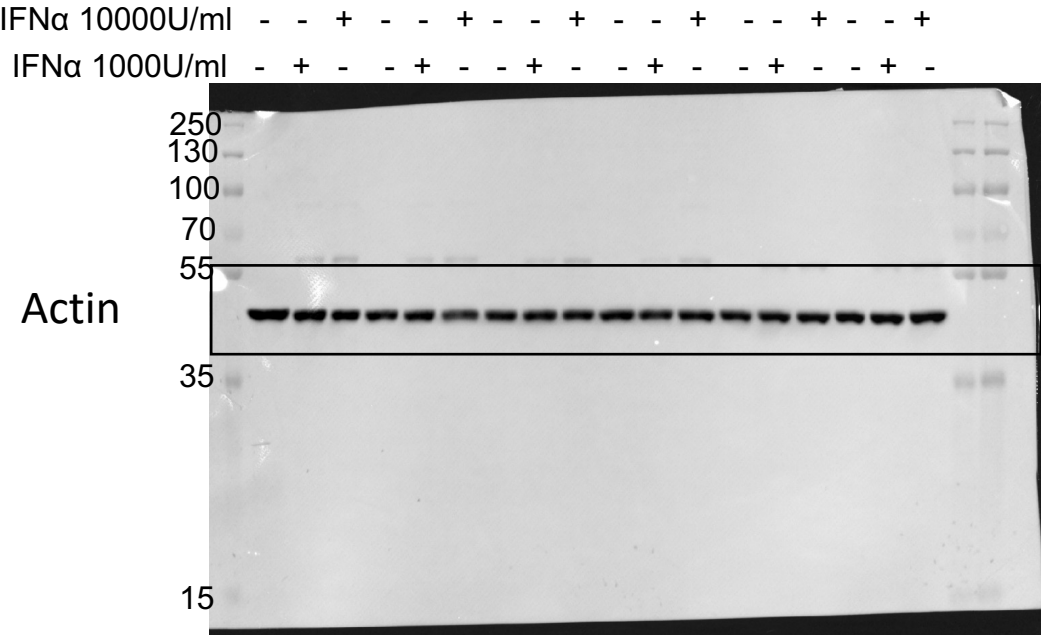

Supplement: JEM_20220666_SourceDataF7.pdf [file JEM_20220666_SourceDataF7.pdf]
