# Supplementary figures and images for: RELA tunes innate-like interferon I/III responses in human T cells
Source: PubMed Central journal article supplement — J Exp Med. 2023 Feb 23;220(5):e20220666. doi: 10.1084/jem.20220666 (PMC9998965; doi:10.1084/jem.20220666), 2023-02-23

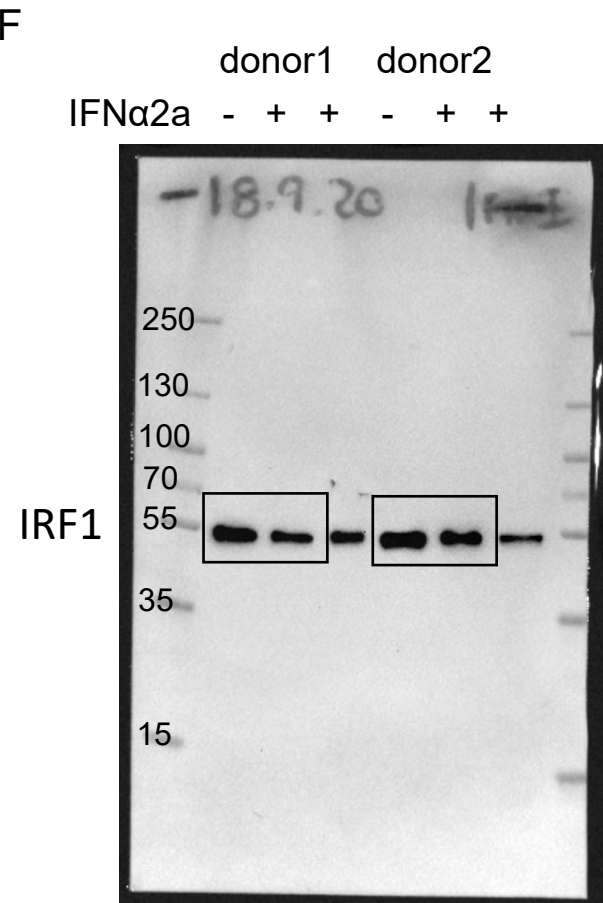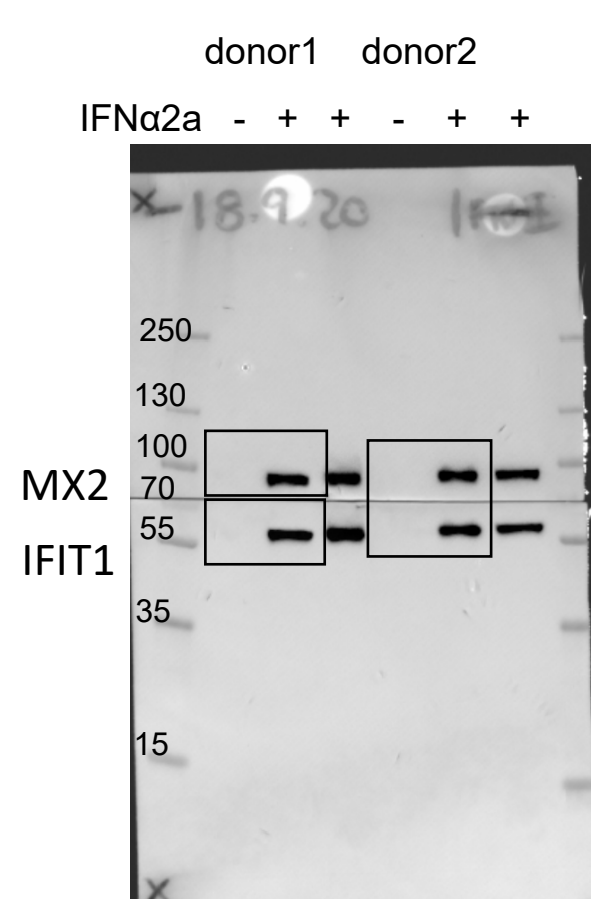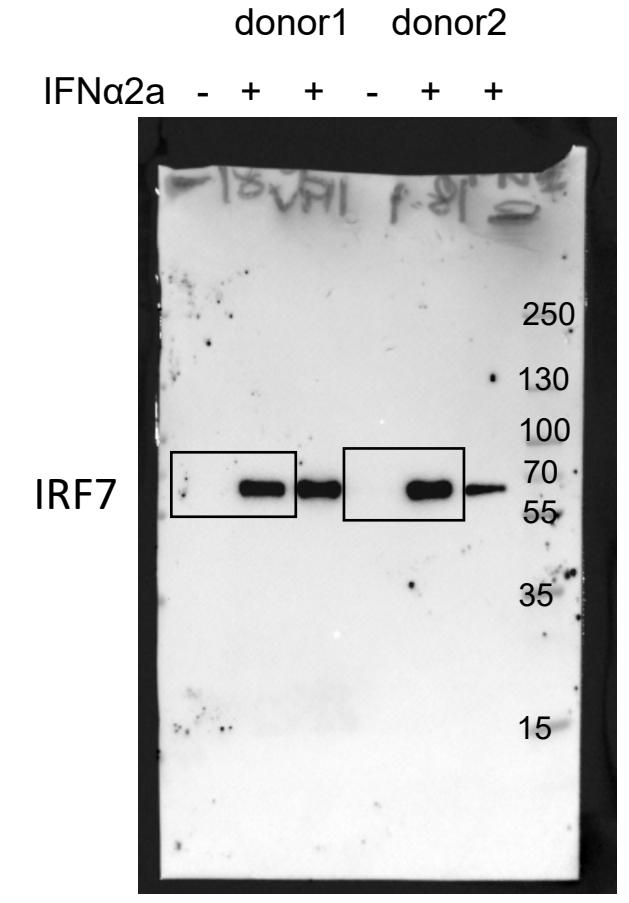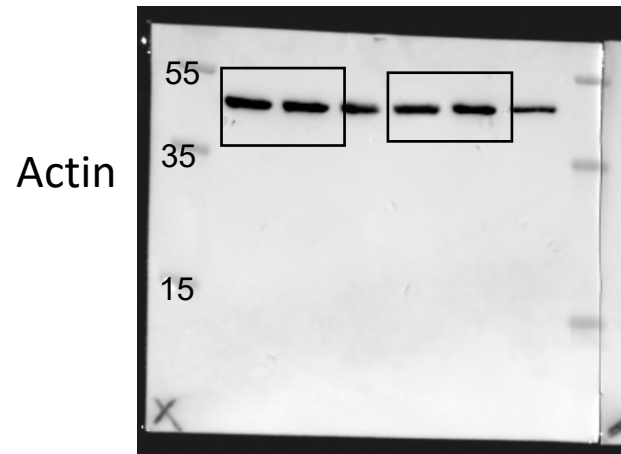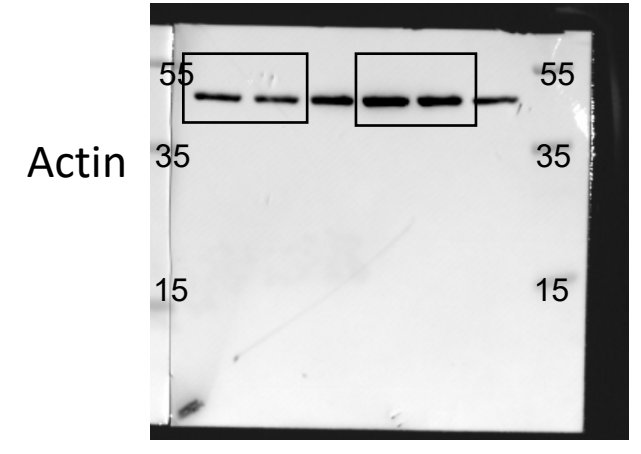

Sendai  
Virus  
protein

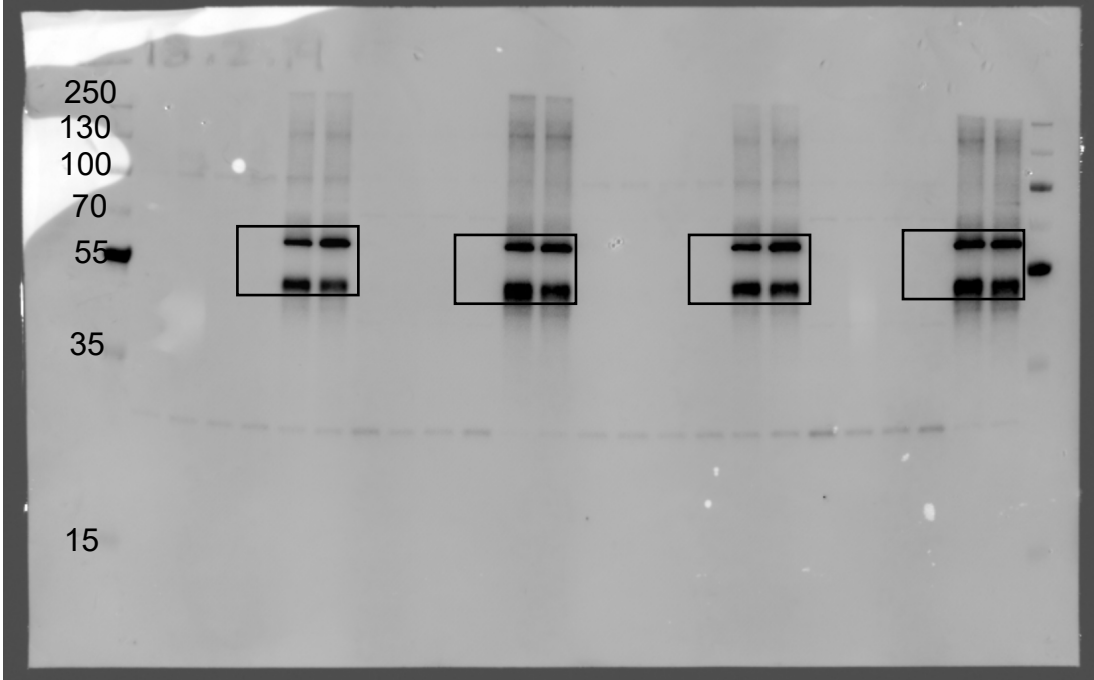

Actin

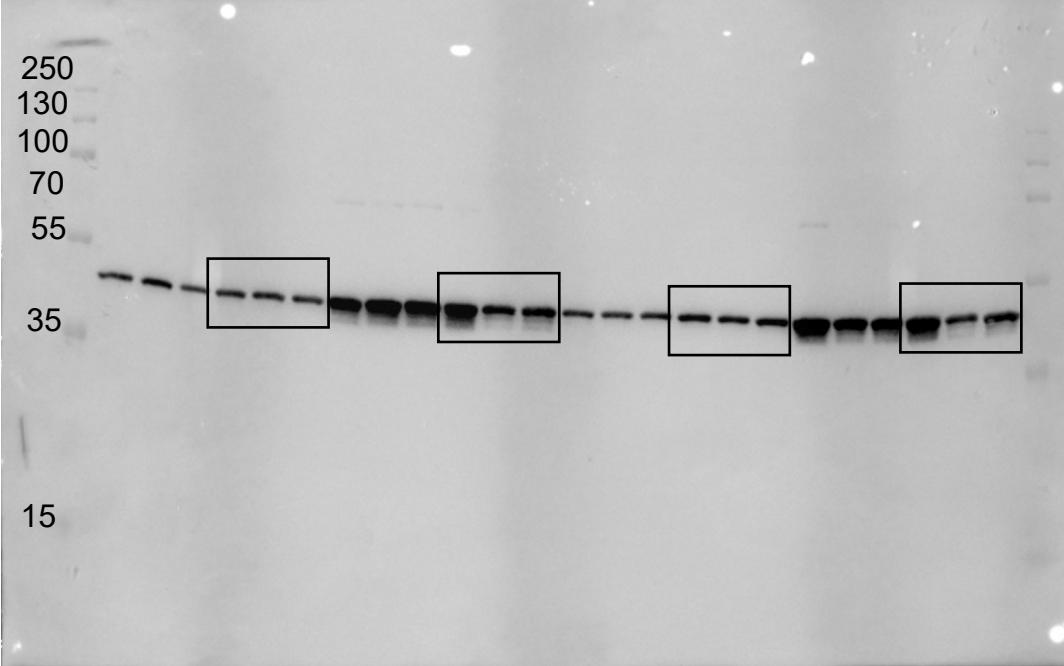

Supplement: JEM_20220666_SourceDataFS1.pdf [file JEM_20220666_SourceDataFS1.pdf]

|           | Donor1 |   |   |     |   |   | Donor2 |   |   |     |   |   |      |   |   |
|-----------|--------|---|---|-----|---|---|--------|---|---|-----|---|---|------|---|---|
|           | CD4+T  |   |   | MDM |   |   | CD4+T  |   |   | MDM |   |   | THP1 |   |   |
| GFP       | +      | - | - | +   | - | - | +      | - | - | +   | - | - | +    | - | - |
| GFPRELA   | -      | + | - | -   | + | - | -      | + | - | +   | - | - | +    | - | - |
| GFPRELA5R | -      | - | + | -   | - | + | -      | - | + | -   | - | + | -    | - | + |

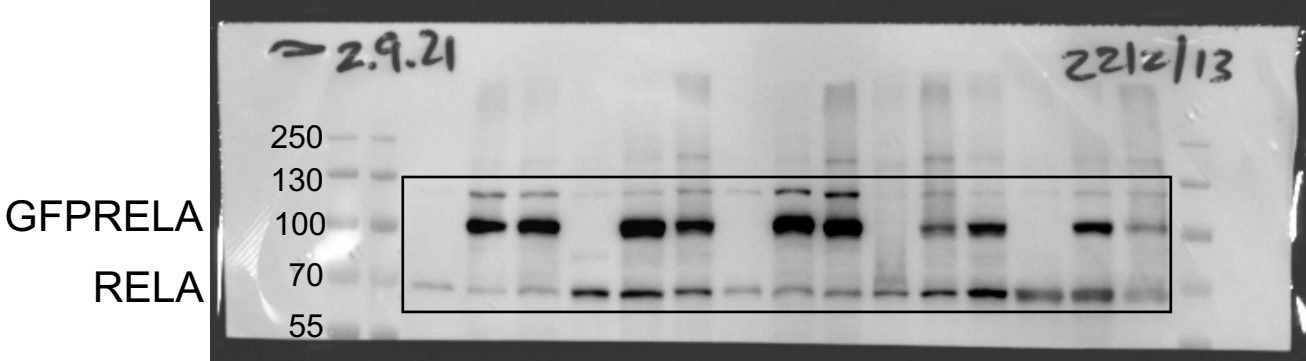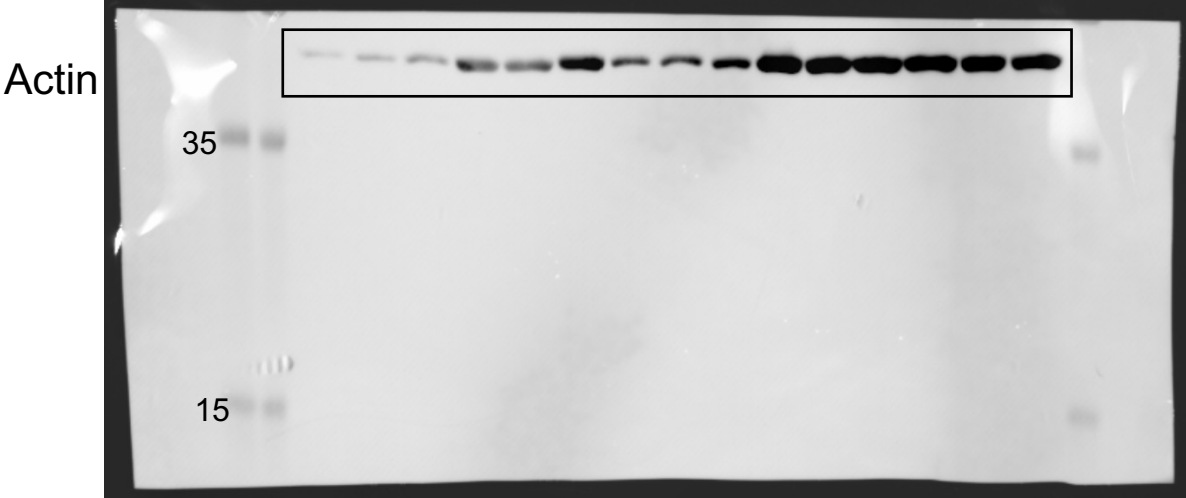

Supplement: JEM_20220666_SourceDataFS2.pdf [file JEM_20220666_SourceDataFS2.pdf]
